# Supplementary material for: Association of endotoxaemia with serum free fatty acids in metabolically healthy and unhealthy abdominally obese individuals: a case–control study in northwest of Iran
Source: PubMed Central journal article supplement — BMJ Open. 2017 May 9;7(5):e015910. doi: 10.1136/bmjopen-2017-015910 (PMC5623386; doi:10.1136/bmjopen-2017-015910), 2017-05-09
Supplement: bmjopen-2017-015910.draft_revisions.pdf [file bmjopen-2017-015910.draft_revisions.pdf]

# BMJ Open

## Association of endotoxemia with serum free fatty acids in metabolically healthy and unhealthy abdominally obese individuals: a case-control study

|                                 |                                                                                                                                                                                                                                                                                                                                                                                                                                                                                                                                                                                                                                                                                                                                                                                                                                                                                                                                                                 |
|---------------------------------|-----------------------------------------------------------------------------------------------------------------------------------------------------------------------------------------------------------------------------------------------------------------------------------------------------------------------------------------------------------------------------------------------------------------------------------------------------------------------------------------------------------------------------------------------------------------------------------------------------------------------------------------------------------------------------------------------------------------------------------------------------------------------------------------------------------------------------------------------------------------------------------------------------------------------------------------------------------------|
| Journal:                        | <i>BMJ Open</i>                                                                                                                                                                                                                                                                                                                                                                                                                                                                                                                                                                                                                                                                                                                                                                                                                                                                                                                                                 |
| Manuscript ID                   | bmjopen-2017-015910                                                                                                                                                                                                                                                                                                                                                                                                                                                                                                                                                                                                                                                                                                                                                                                                                                                                                                                                             |
| Article Type:                   | Research                                                                                                                                                                                                                                                                                                                                                                                                                                                                                                                                                                                                                                                                                                                                                                                                                                                                                                                                                        |
| Date Submitted by the Author:   | 09-Jan-2017                                                                                                                                                                                                                                                                                                                                                                                                                                                                                                                                                                                                                                                                                                                                                                                                                                                                                                                                                     |
| Complete List of Authors:       | Saghafi-Asl, Maryam; Tabriz University of Medical Sciences, Nutrition Research Center, Department of Biochemistry and Diet Therapy, School of Nutrition and Food Sciences, Tabriz University of Medical Sciences, Tabriz, Iran<br>Amiri, Parichehr; Tabriz University of Medical Sciences, Student Research Committee, School of Nutrition and Food Sciences, Tabriz University of Medical Sciences, Tabriz, Iran<br>Naghizadeh, Mahsa; Tabriz University of Medical Sciences, Student Research Committee, School of Nutrition and Food Sciences, Tabriz University of Medical Sciences, Tabriz, Iran<br>Ghavami, Seyed Mostafa; Tabriz University of Medical Sciences, Department of Radiology, School of Paramedicine, Tabriz University of Medical Sciences, Tabriz, Iran<br>Karamzad, Nahid; Maragheh University of Medical Sciences, Department of Public Health, School of Nursing and Midwifery, Maragheh University of Medical Sciences, Maragheh, Iran |
| <b>Primary Subject Heading</b>: | Nutrition and metabolism                                                                                                                                                                                                                                                                                                                                                                                                                                                                                                                                                                                                                                                                                                                                                                                                                                                                                                                                        |
| Secondary Subject Heading:      | Nutrition and metabolism, Public health                                                                                                                                                                                                                                                                                                                                                                                                                                                                                                                                                                                                                                                                                                                                                                                                                                                                                                                         |
| Keywords:                       | free fatty acids, lipopolysaccharide binding protein, metabolic health, abdominal obesity                                                                                                                                                                                                                                                                                                                                                                                                                                                                                                                                                                                                                                                                                                                                                                                                                                                                       |
|                                 |                                                                                                                                                                                                                                                                                                                                                                                                                                                                                                                                                                                                                                                                                                                                                                                                                                                                                                                                                                 |

SCHOLARONE™  
Manuscripts

1  
2  
3  
4 **Association of endotoxemia with serum free fatty acids in metabolically healthy**  
5 **and unhealthy abdominally obese individuals: a case-control study**  
6  
7  
8

9  
10 **Maryam Saghafi-Asl<sup>1</sup>, Parichehr Amiri<sup>2</sup>, Mahsa Naghizadeh<sup>2</sup>, Seyed Mostafa Ghavami<sup>3</sup> and**  
11 **Nahid Karamzad<sup>4,\*</sup>**  
12

13  
14 <sup>1</sup> Nutrition Research Center, Department of Biochemistry and Diet Therapy, School of Nutrition  
15 and Food Sciences, Tabriz University of Medical Sciences, Tabriz, Iran  
16

17  
18 <sup>2</sup> Student Research Committee, School of Nutrition and Food Sciences, Tabriz University of  
19 Medical Sciences, Tabriz, Iran  
20

21  
22 <sup>3</sup> Department of Radiology, School of Paramedicine, Tabriz University of Medical Sciences,  
23 Tabriz, Iran  
24

25  
26 <sup>4</sup> Department of Public Health, School of Nursing and Midwifery, Maragheh University of  
27 Medical Sciences, Maragheh, Iran  
28

29  
30  
31  
32 **Running Title:** Association of endotoxemia with serum free fatty acids  
33  
34  
35  
36  
37  
38

39 **\*Corresponding Author:** Nahid Karamzad, Department of Public Health, School of Nursing and  
40 Midwifery, Maragheh University of Medical Sciences, Maragheh, Iran.  
41  
42

43 **E-mail address:** nahidkaramzad@gmail.com  
44  
45  
46  
47  
48  
49  
50  
51  
52  
53  
54  
55  
56  
57  
58  
59  
60

## Abstract

**Objectives:** We compared serum FFAs and lipopolysaccharide binding protein (LBP) between metabolically healthy abdominally obese (MHAO) and metabolically unhealthy abdominally obese (MUAO) individuals. We also examined the association between serum FFAs and LBP in the participants.

**Methods:** In this age- and gender-matched case-control study, 164 abdominally obese subjects were recruited from June to November, 2015 in the Northwest of Iran. Demographic data, dietary intake, body composition, anthropometric indices, and physical activity were assessed. Basal blood samples were collected to determine serum metabolic parameters, FFAs, and LBP. Abdominal obesity was defined as having waist circumference (WC)  $\geq$  95cm. Those with 3 or more metabolic alterations were defined as MUAO and those having 2 or less were classified as MHAO.

**Results:** There were no significant differences in dietary intake, anthropometric indices, body composition, and physical activity between the two groups. The odds of MUAO significantly increased by increments in serum FBS (OR= 3.79, 95 % CI: 2.25-6.40), TG (OR= 1.10, 95 % CI: 1.05-1.15), SBP (OR= 1.02, 95 % CI: 1.00-1.04), and DBP (OR= 1.03, 95 % CI: 1.01-1.06) and decreased by increase in serum HDL-C (OR= 0.32, 95 % CI: 0.20-0.52). The levels of LBP and FFAs showed no significant differences between the two groups. However, significant correlations were found between LBP and FFAs in pooled population ( $r=0.712$ ;  $P<0.001$ ) as well as in cases ( $r=0.717$ ;  $P<0.001$ ) and controls ( $r=0.704$ ;  $P<0.001$ ). Neither FFAs nor LBP was significantly correlated with dietary intake or metabolic parameters.

1  
2  
3 **Conclusion:** The results indicated that serum LBP and FFAs are highly correlated both in MHAO  
4  
5  
6 and MUAO states. In addition, the levels of LBP and FFAs seem to be more related to abdominal  
7  
8 obesity than to the presence or absence of metabolic health.  
9

10  
11 **Key words:** free fatty acids; lipopolysaccharide binding protein; metabolic health; abdominal  
12  
13 obesity  
14  
15

### 16 17 18 19 20 21 22 23 **Strengths and limitations of this study** 24

- 25  
26  
27 1) The association of LBP and FFAs levels in MHAO and MUAO individuals for the first time and  
28  
29 found significant differences between the two parameters.  
30  
31 2) This was a case-control study in which causality could not be assessed.  
32  
33  
34 3) Insulin levels were not measured in our study population; therefore, insulin resistance was  
35  
36 not studied.  
37  
38  
39  
40  
41  
42  
43  
44  
45  
46  
47  
48  
49  
50  
51  
52  
53  
54  
55  
56  
57  
58  
59  
60

## Introduction

Obesity, a major public health concern, is increasingly prevalent worldwide. This condition is estimated to influence more than one billion people by 2030<sup>1</sup>. There are well-established health consequences of obesity. In particular, the increased risk of type 2 diabetes, metabolic syndrome (MetS), and cardiovascular disease is thought to be highly ascribed to obesity<sup>2-5</sup>. Therefore, obesity can lead to the increased risk of premature death and higher all-cause mortality<sup>6</sup>. However, not all obese people are at higher risk of metabolic diseases. For these subjects, described as “metabolically healthy obese (MHO)”, the obese phenotype may exist in the absence of metabolic dysfunction such as insulin resistance, dyslipidemia, and unfavorable inflammatory profile<sup>7-9</sup>. Despite there is still no uniform definition for MHO, it is thought to account for approximately one fifth of the obese population<sup>10,11</sup>.

Evidence increasingly identifies inflammation as a potential mechanism linking adiposity especially abdominal fat and metabolic dysfunction<sup>12</sup>. However, it is unclear whether inflammation accounts for the metabolic differences observed between metabolically healthy and unhealthy individuals. Published results are rare and conflicting<sup>13-16</sup>. Studies on postmenopausal obese women suggest that the MHO may have more favorable inflammatory profiles<sup>17</sup>, less visceral fat, and possibly less hepatic fat<sup>18</sup> than their counterparts with insulin resistance and other metabolic abnormalities<sup>19</sup>. In contrast, Wildman et al.<sup>20</sup> reported that, despite not finding increased 10-year risk of cardiovascular disease among metabolically healthy overweight/ obese women, these subjects still displayed abnormal levels of inflammatory profile.

1  
2  
3 Basic mechanism accounted for inflammation in adipose tissue is still unknown, but some  
4 factors including free fatty acids (FFAs) concentrations in blood is suggested<sup>21-23</sup>. It was clarified  
5 that plasma FFAs are increased among the obese as it is released from inflamed adipose tissue  
6  
7  
8  
9  
10  
11  
12  
13  
14  
15  
16  
17  
18  
19  
20  
21  
22  
23  
24  
25  
26  
27  
28  
29  
30  
31  
32  
33  
34  
35  
36  
37  
38  
39  
40  
41  
42  
43  
44  
45  
46  
47  
48  
49  
50  
51  
52  
53  
54  
55  
56  
57  
58  
59  
60

Basic mechanism accounted for inflammation in adipose tissue is still unknown, but some factors including free fatty acids (FFAs) concentrations in blood is suggested<sup>21-23</sup>. It was clarified that plasma FFAs are increased among the obese as it is released from inflamed adipose tissue<sup>24</sup> and through the lipolysis of adipocytes<sup>25</sup>. However, little is known about the contribution of FFAs to the development of inflammation in obesity. Therefore, examining the association of FFAs with inflammatory markers seems to be warranted.

Lipopolysaccharide (LPS) molecules, also known as bacterial endotoxins, may trigger inflammation, leading to immunity activation and cytokine release. LPS infusion and consequent subclinical endotoxemia results in elevated levels of proinflammatory markers, dyslipidemia, fasting hyperglycemia, insulin resistance, and obesity - factors known to be associated with MetS<sup>26-28</sup>. LPS has a short half-life<sup>29</sup> and there is no agreement on the measurement of its plasma level<sup>30</sup>. Hence, lipopolysaccharide-binding protein (LBP) is introduced with longer half-life and more reliable measurement<sup>31, 32</sup>. Also, serum LBP level is a proxy of serum LPS level<sup>33</sup>. A population-based study<sup>34</sup> on Chinese people found that LBP was significantly associated with MetS in normal-weight participants. Another study<sup>35</sup> on adult population reported that among MetS components, LBP concentration was independently associated with abdominal obesity.

In prior studies, inflammatory parameters including LPS/ LBP and FFAs were assessed and compared between obese and non-obese or lean subjects<sup>31, 36, 37</sup>. Therefore, it remains unclear whether the observed alterations in serum FFAs and/or inflammatory parameters in metabolically unhealthy obese patients are due to excess adipose tissue mass and/or directly

1  
2  
3 associated with their metabolic state. To distinguish between the influence of obesity and  
4  
5 metabolic disorder, we hypothesized that altered serum inflammatory marker including LBP  
6  
7 and/or FFAs levels are merely related to the abdominally obese state and are not highly  
8  
9 concerned with metabolic aberrations. Therefore, regarding the significant confounding effect  
10  
11 of abdominal obesity, we used waist circumference (WC), which is a reflection of visceral  
12  
13 adipose tissue <sup>38</sup>, to define abdominal obesity, and examined differences in characteristics and  
14  
15 inflammatory markers (serum LBP and FFAs) between “metabolically healthy” and “unhealthy”  
16  
17 abdominally obese individuals. We also examined the association between serum FFAs and LBP  
18  
19 in pooled population as well as in each group.  
20  
21  
22  
23  
24  
25  
26  
27  
28  
29  
30  
31  
32  
33  
34  
35  
36  
37  
38  
39  
40  
41  
42  
43  
44  
45  
46  
47  
48  
49  
50  
51  
52  
53  
54  
55  
56  
57  
58  
59  
60

## Methods

### Study design and participants

A total of 81 metabolically healthy abdominally obese (MHAO) with 83 age- and gender-matched metabolically unhealthy abdominally obese (MUHAO) were recruited in this case-control study, carried out from June 15<sup>th</sup> to November 6<sup>th</sup>, 2015 in the Northwest of Iran. Individuals aged 18-60 years with abdominal obesity were included in the study. We excluded pregnant or lactating women, those with diarrhea for 3 consecutive days within the previous 3 months, diagnosed diabetes, coronary heart disease, stroke, myocardial infarction, cardiovascular and kidney, liver or infectious diseases including tuberculosis, AIDS, and hepatitis; thyroid problems, severe mental disorders or physical disabilities and malignancies; taking oral antidiabetic agents or insulin or other drugs for the last 2 months, or antibiotics used for 3 consecutive days within the previous 3 months; smokers or alcohol consumers; misreported dietary intakes (less than 800 kcal/d or more than 4200 kcal/d), or being on specific diets in the past 6 months; and having gastrointestinal surgery within past 1 year.

Abdominal obesity was defined as having waist circumference (WC)  $\geq 95$  cm according to the Iranian new cut-point<sup>39</sup>. According to Meigs *et al.*, metabolic health was defined as the presence of <3 of the following metabolic abnormalities including WC  $\geq 95$  cm for both genders; high serum triglyceride (TG) concentration ( $\geq 150$  mg/dL); low serum high density lipoprotein cholesterol (HDL-C) (<40 mg/dL for men and <50 mg/dL for women); elevated blood pressure (BP) ( $\geq 130/85$  mmHg); and fasting blood sugar (FBS) ( $\geq 100$  mg/dL). Eighty-one individuals had



1  
2  
3 ≥3 criteria for MUAO and formed the case group (MUAO), whereas 83 had ≤2 criteria and  
4  
5 entered the control group (MHAO).  
6  
7  
8  
9  
10

### 11 12 **Sampling procedures**

13  
14  
15  
16 After public announcement for the study, 500 volunteers were recruited from general  
17  
18 population. Of these, 178 people could enter the study based on the defined eligibility criteria  
19  
20 for the present study. Informed consent was taken from each participant before the study.  
21  
22 After taking blood samples and anthropometric measurements, 14 of them were excluded due  
23  
24 to FBS≥126 mg/d, leaving 164 people (82 men, 82 women) to conduct the research.  
25  
26  
27  
28  
29  
30  
31  
32

### 33 **Biochemical assays**

34  
35  
36 After a 12-h overnight fast, 5cc blood was obtained for serum analyses. After centrifugation at  
37  
38 3000 rpm for 5 min, metabolic parameters were analyzed immediately and serum FFAs and LBP  
39  
40 which were analyzed after supplying in -80°C.  
41  
42

43  
44 FBS was measured by the enzymatic colorimetric method using glucose oxidase. Serum TG  
45  
46 concentration was measured by commercially available enzymatic reagents with glycerol  
47  
48 phosphate oxidase. Serum HDL-C was measured after precipitation of the apolipoprotein B  
49  
50 containing lipoproteins with phosphotungstic acid. Assays were performed using Pars Azmoon  
51  
52 kits (Pars Azmoon Inc., Tehran, Iran) and a Selectra 2 auto-analyzer (Vital Scientific, Spankeren,  
53  
54 Netherlands). Inter- and intra- assay coefficient of variation (CV) was < 5% for all assays. Serum  
55  
56  
57  
58  
59  
60

1  
2  
3 samples for both LBP and FFAs assays were stored at -80°C until analysis. Both serum LBP and  
4  
5  
6 FFAs levels were determined by a sandwich ELISA (Bioassay Technology Laboratory, Shanghai  
7  
8 Korean Biotech Co., LTD; Shanghai City, China) according to the manufacturer's instructions.  
9  
10  
11 The intra-assay and inter-assay coefficients of variation were <8 and <10%, respectively.  
12  
13

### 14 15 16 17 18 **Measurements** 19

20  
21 All anthropometric indices were measured by a trained researcher. Height (without shoes in  
22  
23 standard situation with precision of 0.1 cm and with an inelastic measuring tape) and weight  
24  
25 (with Seca scale, light clothes and precision of 0.1 kg) were measured and BMI was calculated  
26  
27 as weight in kgs divided by the square of height in meters <sup>40</sup>. WC was measured using a non-  
28  
29 stretchable fiber measuring tape. The subjects were asked to stand erect in relaxed position  
30  
31 with both feet together on flat surface. WC was measured as the smallest horizontal girth  
32  
33 between the costal and iliac crests at minimal respiration. Hip circumference was taken as the  
34  
35 greatest circumference at the level of greater trochanters (the widest portion of the hip) on  
36  
37 both sides. Waist to hip ratio (WHR) was calculated by dividing WC (cm) by hip circumference  
38  
39 (cm) <sup>41</sup>. BP was recorded in a comfortable sitting position in the left arm after at least a 5-min  
40  
41 rest, using the mercury sphygmomanometer. Two measurements were taken and the mean of  
42  
43 the two measurements was considered as the BP <sup>42</sup>. Bioelectrical Impedance Analysis (BIA: BC-  
44  
45 418MA, Tanita, Japan) was used to describe fat percent, fat Mass (FM), and fat free mass (FFM).  
46  
47 Dietary intake was assessed using a 3-day food record (one weekend day and two workdays).  
48  
49  
50  
51  
52  
53  
54  
55  
56  
57  
58  
59  
60

1  
2  
3 *Nutritionist IV* software (Axxya Systems, Stafford, TX), modified for Iranian foods, were used for  
4 dietary data analysis. Physical activity (PA) was measured via IPAQ-long form questionnaire<sup>43</sup>.  
5  
6  
7  
8

### 9 **Statistical analysis and sample size**

10  
11  
12 To examine the normal distribution of variables, Kolmogorov-Smirnov tests and histograms were  
13 applied. The independent samples t-test was used to compare the means (SD) of normally  
14 distributed variables between the two groups. The Mann–Whitney U test was used for values  
15 with skewed distribution and in such conditions, median (25<sup>th</sup>, 75<sup>th</sup>) was reported. In order to  
16 assess the association of two categorical variables, Chi-square test was applied. The correlation  
17 between serum FFAs and LBP was assessed using Spearman correlation coefficient analysis.  
18 Odds ratios and their 95% confidence intervals (CI) were reported using Logistic Regression test.  
19  
20  
21  
22  
23  
24  
25  
26  
27  
28  
29  
30

31 The sample size estimation was based upon 80% power with  $\alpha$ -error of 5% and a case to control  
32 ratio of 1:1. It was predicted that 79 people in each group would detect changes in serum FFAs  
33 (31) as well as serum LBP level (32), using the two-means formula. Data were analyzed using  
34 SPSS ver. 17.0 for Windows (PASW Statistics; SPSS Inc., Chicago, IL, USA). P-value less than 0.05  
35 was considered significant.  
36  
37  
38  
39  
40  
41  
42  
43  
44  
45  
46  
47  
48  
49  
50  
51  
52  
53  
54  
55  
56  
57  
58  
59  
60

## Results

Males comprised about 50% of the study participants in the two groups ( $p=0.87$ ). The age range of the subjects was 20-59 years. Participants of the two study groups similarly had  $WC \geq 95$  cm i.e. the cut-off point of WC for Iranian population. Overall, there were no significant differences in age, gender, anthropometric indices, and body composition between the two groups. Dietary parameters especially total fat, SFA, MUFA, PUFA intakes were more or less the same between the two study groups (Table 1). Marital status, education level, and job of the cases and controls were also similar. However, mean number of metabolic aberrations were significantly higher in cases than controls ( $3.25 \pm 0.72$  vs.  $1.67 \pm 0.50$ ;  $P < 0.001$ ) (data not shown).

Except for WC which was matched between the two groups, metabolic aberrations including low HDL-C (82% vs. 34%), high TG (78% vs. 24%), high FBS (33% vs. 0%), and Htn (34% vs. 10%) were significantly higher in case than controls, respectively (Figure 1). The current study indicated that each 10 unit increment in serum FBS level increased the risk of MUAO about 3.8 times (OR= 3.79, 95 % CI: 2.25-6.40). Additionally, the odds of MUAO was significantly increased per one increment in serum TG level (OR= 1.10, 95 % CI: 1.05-1.15), the systolic BP (OR= 1.02, 95 % CI: 1.00-1.04), and diastolic BP (OR= 1.03, 95 % CI: 1.01-1.06). However, the odds of having MUAO was significantly decreased by 68% per 10 unit increment in serum HDL-C level (OR= 0.32, 95 % CI: 0.20-0.52) (Table 2).

The median of LBP ( $12.32 \mu\text{g/mL}$  in cases vs.  $12.76 \mu\text{g/mL}$  in controls,  $P=0.483$ ) and FFAs ( $1294 \text{ nmol/L}$  in cases vs.  $1333 \text{ nmol/L}$  in controls;  $P=0.686$ ) showed no significant difference between the two groups (Figure 2). However, a significant correlation was found between LBP and FFAs

1  
2  
3 in pooled population ( $r=0.712$ ;  $P<0.001$ ) as well as in cases ( $r=0.717$ ;  $P<0.001$ ) and controls  
4  
5  
6 ( $r=0.704$ ;  $P<0.001$ ) (Figure 3). The results of partial correlation indicated much stronger  
7  
8 correlation between LBP and FFAs, when controlling for WC ( $r=0.961$ ;  $P<0.001$ ). Moreover,  
9  
10 number of metabolic aberrations were significantly correlated with HDL-C ( $r=-0.537$ ;  $P<0.001$ ),  
11  
12 TG ( $r=0.468$ ;  $P<0.001$ ), FBS ( $r=0.534$ ;  $P<0.001$ ), Systolic BP ( $r=0.247$ ;  $P=0.001$ ), and Diastolic BP  
13  
14 ( $r=0.315$ ;  $P<0.001$ ). Neither FFAs nor LBP was significantly correlated with dietary intake of total  
15  
16 fat, SFA, MUFA, and PUFA (data not shown). There were also no significant correlations of LBP  
17  
18 and FFAs with metabolic parameters (Table 3).  
19  
20  
21  
22  
23  
24  
25  
26  
27  
28  
29  
30  
31  
32  
33  
34  
35  
36  
37  
38  
39  
40  
41  
42  
43  
44  
45  
46  
47  
48  
49  
50  
51  
52  
53  
54  
55  
56  
57  
58  
59  
60

## Discussion

The present study, to the best of our knowledge, examined the association of LBP and FFAs levels in MHAO and MUAO individuals for the first time and found significant differences between the two parameters. Anthropometric indices as well as body composition profile were similar between the two groups. Moreover, there were no significant differences in LBP and FFAs between MHAO and MUAO.

In the present study, we matched metabolically healthy with metabolically unhealthy individuals on abdominal fat which might explain why we did not find any differences in levels of FFAs and LBP, as inflammatory markers, and body composition between the two groups. Therefore, the levels of LBP and FFAs seem to be more related to abdominal obesity than to the presence or absence of metabolic health. This is further supported by the observation that serum FFAs or LBP levels were not correlated with metabolic parameters. Therefore, our findings suggest that increased levels of these two markers are not necessarily related to the presence of metabolic aberrations.

A few smaller studies have examined differences in body composition and/or inflammatory profile between metabolically healthy and unhealthy obese postmenopausal women<sup>44-46</sup>. In line with our result, Engström *et al.*<sup>45</sup> in a research on 58 obese postmenopausal women found no significant differences in levels of inflammatory markers between those with metabolic syndrome (MetS) compared to those without MetS. Additionally, in the population-based study of Philips *et al.*<sup>47</sup>, no significant difference was noted in CRP level between MHAO and MUAO,

1  
2  
3 based on metabolic health criteria of Meigs *et al.* <sup>48</sup> It is noteworthy that in the present study  
4 we used Meigs's metabolic health definition in which WC has also been considered <sup>48</sup>.  
5  
6

7  
8 A recent study revealed that the association between inflammatory biomarkers and  
9 metabolically healthy obesity depends on the criteria used. Since in that research, a significant  
10 difference was noted in the levels of CRP and IL-6 with some but not all MHAO definitions,  
11 which disappeared after adjustment for abdominal obesity or percent body fat <sup>49</sup>. This study  
12 confirms our results. However, Phillips *et al.* <sup>6</sup> showed that obese women and men with MetS  
13 had significantly higher levels of inflammatory cytokines than obese persons without MetS.  
14 Beasley *et al.* <sup>50</sup> showed that visceral adiposity, and not abdominal subcutaneous fat, was most  
15 consistently associated with significantly higher levels of IL-6 and CRP levels in black and white  
16 men and women in the Health ABC study. We could not measure visceral fat in our study,  
17 though, abdominal obesity measured through WC, can reflect visceral adiposity <sup>38</sup>. On the other  
18 hand, a recent work observed no significant differences in visceral fat between the obese-  
19 insulin resistant and obese-insulin sensitive persons <sup>51</sup>.  
20  
21

22 In the present work, dietary intake was compared between the two obese groups; therefore,  
23 no significant difference was found in terms of energy or macronutrients especially fat intake.  
24 Moreover, habitual PA was controlled between the study groups. Since different levels of  
25 habitual PA might affect levels of serum inflammatory markers <sup>52</sup>.  
26  
27

28 Obesity, as a well-known metabolic risk factor, is usually associated with mild chronic  
29 inflammation <sup>53</sup>. The relationship between obesity and increased inflammation may be justified,  
30 in part, by FFAs <sup>54</sup> which are released from adipocytes through lipolysis and are elevated in  
31  
32  
33  
34  
35  
36  
37  
38  
39  
40  
41  
42  
43  
44  
45  
46  
47  
48  
49  
50  
51  
52  
53  
54  
55  
56  
57  
58  
59  
60

1  
2  
3 obesity due to increased adipose tissue <sup>55</sup>. Inflammatory cytokines such as interleukin-6 (IL-6)  
4  
5 can stimulate lipolysis and increase levels of FFAs <sup>56</sup>. On the other hand, in healthy persons an  
6  
7 acute increase in FFAs can induce inflammatory changes <sup>57</sup>. Therefore, FFAs are not only  
8  
9 increased by inflammation, but also promote inflammation. The results of the present research  
10  
11 showed that FFAs are positively correlated with LBP levels either in the pooled population or in  
12  
13 each group. It shows that any increase in the level of FFAs, observed in the abdominally obese,  
14  
15 regardless of their metabolic aberrations can lead to a significant elevation in the level of LBP.  
16  
17  
18  
19

20  
21 LBP has been considered a key inflammatory marker which mediates LPS-triggered innate  
22  
23 immunity <sup>58</sup>. Although LBP concentration was previously reported to be associated with various  
24  
25 anthropometric and metabolic factors such as BMI, WC, and so on <sup>35-37</sup>, in our study the  
26  
27 relationship only existed between the two biomarkers, FFAs and LBP, but not with the  
28  
29 metabolic or anthropometric parameters. It is notable that the positive relationship between  
30  
31 LBP and BMI was not observed in either normal weight or obese groups in Yang *et al.* <sup>59</sup> study  
32  
33 after multivariate analyses. In their research, the level of LBP significantly reduced after  
34  
35 bariatric surgery and consequent reduction in WC (from 121.6 cm to 90.6 cm;  $P < 0.001$ ) which  
36  
37 indicates the strong association of LBP with WC. Liu *et al.* <sup>34</sup> in a population-based follow-up  
38  
39 study on 2529 Chinese also found that the association of LBP with MetS was only significant in  
40  
41 normal-weight participants, but not in their overweight/obese counterparts after multivariate  
42  
43 adjustments including BMI, which supports our study findings. It is assumed that the  
44  
45 association between serum LBP level and MetS observed in previous studies <sup>31, 36, 37</sup> is mediated  
46  
47  
48  
49  
50  
51  
52  
53  
54  
55  
56  
57  
58  
59  
60



1  
2  
3 by BMI or WC, and finding no association between serum LBP level and incidence of MetS in  
4  
5  
6 our study, in which the WC-matched controls were included, is not unexpected.  
7

8  
9 Overall, what makes our research different from most of previous ones is that in our study we  
10  
11 matched the two groups based on WC, rarely observed in prior reports. Most of the previous  
12  
13 studies have examined either MetS patients vs. those without the syndrome or metabolically  
14  
15 healthy vs. metabolically unhealthy, regardless of their BMI or WC status and based on  
16  
17 different metabolic health criteria <sup>7, 9, 17, 48</sup>. A few have examined inflammatory markers  
18  
19 between metabolically healthy and unhealthy persons, considering WC or abdominal obesity <sup>45,</sup>  
20  
21  
22  
23 <sup>47, 49</sup>.

## 30 **Conclusion**

31  
32  
33 Our study indicated that WC could be a strong mediator of the association between serum LBP,  
34  
35 FFAs, and metabolic alterations. In fact, the levels of LBP and FFAs seem to be more related to  
36  
37 abdominal obesity than to the presence or absence of metabolic health. The results also  
38  
39 suggested a significant correlation between serum FFAs and LBP in abdominally obese  
40  
41 population, which seems to be independent of metabolic aberrations.  
42  
43  
44  
45  
46  
47  
48

## 50 **Competing of interests:**

51  
52  
53 The authors declare that they have no competing interests  
54  
55  
56  
57  
58  
59  
60

### Authors' contributions

MS and NK conceived the study design and wrote the study protocol. MS and NK analyzed and interpreted the data. MS, PA, MN, SMG and NK have been involved in drafting the manuscript or revising it critically for content. All authors have given final approval of the version to be published.

### Acknowledgments

We would like to thank those who participated in the present study.

### Ethical considerations

All protocols were approved by regional and organizational ethics committee of TBZMED and MRGUMS, respectively. Written informed consent was taken from each participant. Research was carried out in compliance with the Helsinki Declaration.

### Consent for publication

Not applicable.

### Funding

The present study was funded by the TBZMED and MRGUMS.

## References

1. Kelly T, Yang W, Chen C-S, Reynolds K and He J. Global burden of obesity in 2005 and projections to 2030. *International Journal of Obesity*. 2008; 32: 1431-7.
2. Finucane MM, Stevens GA, Cowan MJ, et al. National, regional, and global trends in body-mass index since 1980: systematic analysis of health examination surveys and epidemiological studies with 960 country-years and 9· 1 million participants. *The Lancet*. 2011; 377: 557-67.
3. Hu FB, Willett WC, Li T, Stampfer MJ, Colditz GA and Manson JE. Adiposity as compared with physical activity in predicting mortality among women. *New England Journal of Medicine*. 2004; 351: 2694-703.
4. Malik VS, Willett WC and Hu FB. Global obesity: trends, risk factors and policy implications. *Nature Reviews Endocrinology*. 2013; 9: 13-27.
5. Pischon T, Boeing H, Hoffmann K, et al. General and abdominal adiposity and risk of death in Europe. *New England Journal of Medicine*. 2008; 359: 2105-20.
6. Phillips CM, Dillon C, Harrington JM, et al. Defining metabolically healthy obesity: role of dietary and lifestyle factors. *PLoS One*. 2013; 8: e76188.
7. Karelis A and Rabasa-Lhoret R. Inclusion of C-reactive protein in the identification of metabolically healthy but obese (MHO) individuals. *Diabetes & metabolism*. 2008; 34: 183-4.
8. Stefan N, Kantartzis K, Machann J, et al. Identification and characterization of metabolically benign obesity in humans. *Archives of internal medicine*. 2008; 168: 1609-16.
9. Wildman RP, Muntner P, Reynolds K, et al. The obese without cardiometabolic risk factor clustering and the normal weight with cardiometabolic risk factor clustering: prevalence and correlates of 2 phenotypes among the US population (NHANES 1999-2004). *Archives of internal medicine*. 2008; 168: 1617-24.
10. Blüher M. The distinction of metabolically 'healthy' from 'unhealthy' obese individuals. *Current opinion in lipidology*. 2010; 21: 38-43.
11. Primeau V, Coderre L, Karelis A, et al. Characterizing the profile of obese patients who are metabolically healthy. *International Journal of Obesity*. 2011; 35: 971-81.
12. Hotamisligil GS. Inflammation and metabolic disorders. *Nature*. 2006; 444: 860-7.
13. Festa A, D'Agostino Jr R, Williams K, et al. The relation of body fat mass and distribution to markers of chronic inflammation. *International Journal of Obesity & Related Metabolic Disorders*. 2001; 25.
14. Desai MY, Dalal D, Santos RD, Carvalho JA, Nasir K and Blumenthal RS. Association of body mass index, metabolic syndrome, and leukocyte count. *The American journal of cardiology*. 2006; 97: 835-8.
15. Nishida M, Moriyama T, Sugita Y and Yamauchi-Takahara K. Abdominal obesity exhibits distinct effect on inflammatory and anti-inflammatory proteins in apparently healthy Japanese men. *Cardiovascular diabetology*. 2007; 6: 1.
16. Guilder GP, Hoetzer GL, Greiner JJ, Stauffer BL and DeSouza CA. Influence of metabolic syndrome on biomarkers of oxidative stress and inflammation in obese adults. *Obesity*. 2006; 14: 2127-31.
17. Messier V, Karelis AD, Prud'homme D, Primeau V, Brochu M and Rabasa-Lhoret R. Identifying metabolically healthy but obese individuals in sedentary postmenopausal women. *Obesity*. 2010; 18: 911-7.
18. Messier V, Karelis AD, Robillard M-È, et al. Metabolically healthy but obese individuals: relationship with hepatic enzymes. *Metabolism*. 2010; 59: 20-4.

19. Karelis AD, Faraj M, Bastard J-P, et al. The metabolically healthy but obese individual presents a favorable inflammation profile. *The Journal of Clinical Endocrinology & Metabolism*. 2005; 90: 4145-50.
20. Wildman RP, Kaplan R, Manson JE, et al. Body size phenotypes and inflammation in the Women's Health Initiative Observational Study. *Obesity*. 2011; 19: 1482-91.
21. Stuart Wood I, Wang B, Lorente-Cebrián S and Trayhurn P. Hypoxia increases expression of selective facilitative glucose transporters (GLUT) and 2-deoxy-D-glucose uptake in human adipocytes. *Biochemical and biophysical research communications*. 2007; 361: 468-73.
22. Blüher M. Adipose tissue dysfunction in obesity. *Experimental and clinical endocrinology & diabetes*. 2009; 117: 241-50.
23. Ye J. Emerging role of adipose tissue hypoxia in obesity and insulin resistance. *International Journal of Obesity*. 2008; 33: 54-66.
24. Karpe F, Dickmann JR and Frayn KN. Fatty acids, obesity, and insulin resistance: time for a reevaluation. *Diabetes*. 2011; 60: 2441-9.
25. Boden G. Role of fatty acids in the pathogenesis of insulin resistance and NIDDM. *Diabetes*. 1997; 46: 3-10.
26. Cani PD, Amar J, Iglesias MA, et al. Metabolic endotoxemia initiates obesity and insulin resistance. *Diabetes*. 2007; 56: 1761-72.
27. Laugerette F, Vors C, Peretti N and Michalski M-C. Complex links between dietary lipids, endogenous endotoxins and metabolic inflammation. *Biochimie*. 2011; 93: 39-45.
28. Mehta NN, McGillicuddy FC, Anderson PD, et al. Experimental endotoxemia induces adipose inflammation and insulin resistance in humans. *Diabetes*. 2010; 59: 172-81.
29. Munford RS. Invited review: Detoxifying endotoxin: time, place and person. *Journal of endotoxin research*. 2005; 11: 69-84.
30. Amar J, Burcelin R, Ruidavets JB, et al. Energy intake is associated with endotoxemia in apparently healthy men. *The American journal of clinical nutrition*. 2008; 87: 1219-23.
31. Albillos A, de la Hera A, González M, et al. Increased lipopolysaccharide binding protein in cirrhotic patients with marked immune and hemodynamic derangement. *Hepatology*. 2003; 37: 208-17.
32. Ruiz AG, Casafont F, Crespo J, et al. Lipopolysaccharide-binding protein plasma levels and liver TNF-alpha gene expression in obese patients: evidence for the potential role of endotoxin in the pathogenesis of non-alcoholic steatohepatitis. *Obesity surgery*. 2007; 17: 1374-80.
33. Romaní J, Caixàs A, Escoté X, et al. Lipopolysaccharide-binding protein is increased in patients with psoriasis with metabolic syndrome, and correlates with C-reactive protein. *Clinical and experimental dermatology*. 2013; 38: 81-4.
34. Liu X, Lu L, Yao P, et al. Lipopolysaccharide binding protein, obesity status and incidence of metabolic syndrome: a prospective study among middle-aged and older Chinese. *Diabetologia*. 2014; 57: 1834-41.
35. Gonzalez-Quintela A, Alonso M, Campos J, Vizcaino L, Loidi L and Gude F. Determinants of serum concentrations of lipopolysaccharide-binding protein (LBP) in the adult population: the role of obesity. *PLoS One*. 2013; 8: e54600.
36. Moreno-Navarrete J, Ortega F, Serino M, et al. Circulating lipopolysaccharide-binding protein (LBP) as a marker of obesity-related insulin resistance. *International journal of obesity*. 2012; 36: 1442-9.
37. Sun L, Yu Z, Ye X, et al. A marker of endotoxemia is associated with obesity and related metabolic disorders in apparently healthy Chinese. *Diabetes care*. 2010; 33: 1925-32.
38. Kuk JL, Lee S, Heymsfield SB and Ross R. Waist circumference and abdominal adipose tissue distribution: influence of age and sex. *The American journal of clinical nutrition*. 2005; 81: 1330-4.
39. Ormseth MJ, Swift LL, Fazio S, et al. Free fatty acids are associated with insulin resistance but not coronary artery atherosclerosis in rheumatoid arthritis. *Atherosclerosis*. 2011; 219: 869-74.

- 1  
2  
3  
4  
5  
6  
7  
8  
9  
10  
11  
12  
13  
14  
15  
16  
17  
18  
19  
20  
21  
22  
23  
24  
25  
26  
27  
28  
29  
30  
31  
32  
33  
34  
35  
36  
37  
38  
39  
40  
41  
42  
43  
44  
45  
46  
47  
48  
49  
50  
51  
52  
53  
54  
55  
56  
57  
58  
59  
60
40. Mirmiran P, Esmailzadeh A and Azizi F. Detection of cardiovascular risk factors by anthropometric measures in Tehranian adults: receiver operating characteristic (ROC) curve analysis. *European journal of clinical nutrition*. 2004; 58: 1110-8.
41. Taylor RW, Jones IE, Williams SM and Goulding A. Evaluation of waist circumference, waist-to-hip ratio, and the conicity index as screening tools for high trunk fat mass, as measured by dual-energy X-ray absorptiometry, in children aged 3–19 y. *The American journal of clinical nutrition*. 2000; 72: 490-5.
42. Azizi F, Ghanbarian A, Madjid M and Rahmani M. Distribution of blood pressure and prevalence of hypertension in Tehran adult population: Tehran Lipid and Glucose Study (TLGS), 1999-2000. *Journal of human hypertension*. 2002; 16: 305-12.
43. Vasheghani-Farahani A, Tahmasbi M, Asheri H, Ashraf H, Nedjat S and Kordi R. The Persian, last 7-day, long form of the International Physical Activity Questionnaire: translation and validation study. *Asian journal of sports medicine*. 2011; 2: 106.
44. Halkes C, Van Dijk H, De Jaegere PT, et al. Postprandial increase of complement component 3 in normolipidemic patients with coronary artery disease effects of expanded-dose simvastatin. *Arteriosclerosis, thrombosis, and vascular biology*. 2001; 21: 1526-30.
45. Engström G, Hedblad B, Eriksson K-F, Janzon L and Lindgärde F. Complement C3 Is a Risk Factor for the Development of Diabetes A Population-Based Cohort Study. *Diabetes*. 2005; 54: 570-5.
46. Detection EPO. EVALUATION, AND TREATMENT OF HIGH BLOOD CHOLESTEROL IN ADULTS. Executive summary of the third report of The National Cholesterol Education Program (NCEP) Expert panel on detection, evaluation, and treatment of high blood cholesterol in adults (Adult Treatment Panel III). *Jama*. 2001; 285: 2486-97.
47. Phillips CM, Kesse-Guyot E, Ahluwalia N, et al. Dietary fat, abdominal obesity and smoking modulate the relationship between plasma complement component 3 concentrations and metabolic syndrome risk. *Atherosclerosis*. 2012; 220: 513-9.
48. Meigs JB, Wilson PW, Fox CS, et al. Body mass index, metabolic syndrome, and risk of type 2 diabetes or cardiovascular disease. *The Journal of Clinical Endocrinology & Metabolism*. 2006; 91: 2906-12.
49. Marques-Vidal P, Velho S, Waterworth D, Waeber G, von Känel R and Vollenweider P. The association between inflammatory biomarkers and metabolically healthy obesity depends of the definition used. *European journal of clinical nutrition*. 2012; 66: 426-35.
50. Beasley LE, Koster A, Newman AB, et al. Inflammation and race and gender differences in computerized tomography-measured adipose depots. *Obesity*. 2009; 17: 1062-9.
51. Muscari A, Massarelli G, Bastagli L, et al. Relationship of serum C3 to fasting insulin, risk factors and previous ischaemic events in middle-aged men. *European Heart Journal*. 2000; 21: 1081-90.
52. You T and Nicklas BJ. Effects of exercise on adipokines and the metabolic syndrome. *Current diabetes reports*. 2008; 8: 7-11.
53. Fantuzzi G. Adipose tissue, adipokines, and inflammation. *Journal of Allergy and Clinical Immunology*. 2005; 115: 911-9.
54. Björntorp P, Bergman H and Varnauskas E. Plasma free fatty acid turnover rate in obesity. *Acta medica Scandinavica*. 1969; 185: 351-6.
55. Jensen MD, Haymond MW, Rizza RA, Cryer PE and Miles J. Influence of body fat distribution on free fatty acid metabolism in obesity. *Journal of Clinical Investigation*. 1989; 83: 1168.
56. Boden G, Cheung P, Stein TP, Kresge K and Mozzoli M. FFA cause hepatic insulin resistance by inhibiting insulin suppression of glycogenolysis. *American Journal of Physiology-Endocrinology and Metabolism*. 2002; 283: E12-E9.

- 1  
2  
3  
4  
5  
6  
7  
8  
9  
10  
11  
12  
13  
14  
15  
16  
17  
18  
19  
20  
21  
22  
23  
24  
25  
26  
27  
28  
29  
30  
31  
32  
33  
34  
35  
36  
37  
38  
39  
40  
41  
42  
43  
44  
45  
46  
47  
48  
49  
50  
51  
52  
53  
54  
55  
56  
57  
58  
59  
60
57. Santomauro A, Boden G, Silva M, et al. Overnight lowering of free fatty acids with Acipimox improves insulin resistance and glucose tolerance in obese diabetic and nondiabetic subjects. *Diabetes*. 1999; 48: 1836-41.
58. Schumann RR. Old and new findings on lipopolysaccharide-binding protein: a soluble pattern-recognition molecule. *Biochemical Society Transactions*. 2011; 39: 989-93.
59. Yang P-J, Lee W-J, Tseng P-H, Lee P-H, Lin M-T and Yang W-S. Bariatric surgery decreased the serum level of an endotoxin-associated marker: lipopolysaccharide-binding protein. *Surgery for Obesity and Related Diseases*. 2014; 10: 1182-7.

For peer review only

**Table 1. Demographic, anthropometric, and dietary intake parameters between MUAO and MHAO patients**

| Variables                            | MUAO (n=81)       | MHAO (n=83)       | OR (95% CI)        | <i>p</i>           |
|--------------------------------------|-------------------|-------------------|--------------------|--------------------|
| Age (y)†                             | 38.23 (8.52)      | 37.13 (8.64)      | 1.01 (0.97-1.05)   | 0.412 <sup>ξ</sup> |
| Men (%)                              | 50.6              | 49.4              | 1.05 (0.57-1.93)   | 0.876 <sup>ξ</sup> |
| Physical activity score <sup>‡</sup> | 3144 (1416, 5166) | 2412 (1260, 5211) | 1.00 (0.99, 1.00)  | 0.451 <sup>‡</sup> |
| Weight (Kg)†                         | 87.21 (13.90)     | 84.78 (13.98)     | 1.01 (0.99, 1.03)  | 0.266 <sup>ξ</sup> |
| Height (cm)†                         | 165.09 (11.56)    | 164.56 (10.60)    | 1.00 (0.97, 1.03)  | 0.762 <sup>ξ</sup> |
| Waist circumference (cm) †           | 106.02 (8.30)     | 105.06 (8.63)     | 1.01 (0.97, 1.05)  | 0.470 <sup>ξ</sup> |
| Hip circumference (cm)†              | 110.90 (6.92)     | 111.31 (8.26)     | 0.99 (0.95, 1.03)  | 0.730 <sup>ξ</sup> |
| Waist to hip ratio†                  | 0.95 (0.05)       | 0.94 (0.06)       | 2.73 (0.15, 48.00) | 0.209 <sup>ξ</sup> |
| BMI (Kg/m <sup>2</sup> )†            | 32.16 (4.25)      | 31.35 (4.12)      | 1.04 (0.97, 1.12)  | 0.214 <sup>ξ</sup> |
| Body Fat Percentage (%)†             |                   |                   |                    |                    |
| Males                                | 26.86 (5.15)      | 25.07 (4.86)      | 1.07 (0.98, 1.17)  | 0.093 <sup>ξ</sup> |
| Females                              | 38.59 (4.38)      | 39.88 (4.79)      | 0.93 (0.85, 1.03)  | 0.227 <sup>ξ</sup> |
| Body Fat Mass (kg)†                  |                   |                   |                    |                    |
| Males                                | 25.91 (7.27)      | 22.79 (6.76)      | 1.06 (1.00, 1.13)  | 0.062 <sup>ξ</sup> |
| Females                              | 31.11 (7.33)      | 32.4 (8.63)       | 0.98 (0.92, 1.03)  | 0.441 <sup>ξ</sup> |
| Body Fat Free Mass (kg)†             |                   |                   |                    |                    |
| Males                                | 69.09 (6.69)      | 66.98 (7.85)      | 1.04 (0.98, 1.10)  | 0.130 <sup>ξ</sup> |
| Females                              | 48.72 (5.08)      | 47.61 (4.94)      | 1.04 (0.95, 1.14)  | 0.425 <sup>ξ</sup> |
| Total energy intake (Kcal/day)†      | 2152.9 (765.1)    | 2206.8 (862.9)    | 1.00 (0.97-1.04)   | 0.700 <sup>ξ</sup> |
| Carbohydrate intake (% energy)†      | 60.20 (10.09)     | 59.29 (9.11)      | 1.01 (0.97-1.04)   | 0.499 <sup>ξ</sup> |
| Protein intake (% energy)†           | 14.22 (2.95)      | 14.17 (4.10)      | 1.00 (0.91-1.09)   | 0.937 <sup>ξ</sup> |

|    |                                           |                      |                      |                  |                    |
|----|-------------------------------------------|----------------------|----------------------|------------------|--------------------|
| 1  |                                           |                      |                      |                  |                    |
| 2  |                                           |                      |                      |                  |                    |
| 3  | Total fat intake (% energy) <sup>†</sup>  | 25.58 (10.54)        | 26.54 (12.14)        | 0.98 (0.95-1.02) | 0.380 <sup>ξ</sup> |
| 4  |                                           |                      |                      |                  |                    |
| 5  | Total SFA intake (% energy) <sup>‡</sup>  | 14.06 (10.6, 21.87)  | 14.21 (10.18, 21.49) | 0.99 (0.96-1.02) | 0.780 <sup>Ⓜ</sup> |
| 6  |                                           |                      |                      |                  |                    |
| 7  | Total MUFA intake (% energy) <sup>‡</sup> | 16.39 (11.01, 24.68) | 18.26 (11.76-26.27)  | 0.99 (0.97-1.01) | 0.183 <sup>Ⓜ</sup> |
| 8  |                                           |                      |                      |                  |                    |
| 9  | Total PUFA intake (% energy) <sup>‡</sup> | 12.7 (9.59-22.19)    | 14.41 (8.94, 19.01)  | 1.01 (0.98-1.03) | 0.943 <sup>Ⓜ</sup> |
| 10 |                                           |                      |                      |                  |                    |
| 11 |                                           |                      |                      |                  |                    |
| 12 |                                           |                      |                      |                  |                    |

13 <sup>†</sup>Variables with normal numeric scales are reported as Mean (standard deviation).

14 <sup>‡</sup>Variables with non-normal numeric scales are reported as Median (25<sup>th</sup>, 75<sup>th</sup>).

15 <sup>ξ</sup>Independent Samples t-test

16 <sup>Ⓜ</sup>Mann-Whitney U test

17 <sup>£</sup>Chi Square test

18 MHAO, Metabolically Healthy Abdominally Obese; MUAO, Metabolically Unhealthy Abdominally Obese;

19 OR, Odds Ratio; CI, Confidence Interval; BMI, Body Mass Index; SFA, Saturated Fatty Acids; MUFA, Mono

20 Unsaturated fatty Acids; PUFA, Poly Unsaturated Fatty Acids.



**Table 2. Biochemical characteristics between MUAO and MHAO patients**

| Variables             | MUAO (n=81)    | MHAO (n=83)    | OR (95% CI)       | <i>p</i>            |
|-----------------------|----------------|----------------|-------------------|---------------------|
| FBS (mg/dL) ¥         | 87.72 (5.82)   | 95.50 (9.76)   | 3.79 (2.25-6.40)* | <0.001 <sup>ξ</sup> |
| TG (mg/dL) ¥          | 193 (151, 241) | 112 (88, 146)  | 1.10 (1.05-1.15)* | <0.001 <sup>Ⓜ</sup> |
| HDL-C (mg/dL) †       | 39.53 (6.65)   | 46.44 (9.20)   | 0.32 (0.20-0.52)* | <0.001 <sup>ξ</sup> |
| SBP (mg/dL) ¥         | 115 (16.45)    | 108.13 (16.60) | 1.02 (1.00-1.04)* | 0.009 <sup>ξ</sup>  |
| DBP (mg/dL) ¥         | 77.31 (13.86)  | 70.84 (12.94)  | 1.03 (1.01-1.06)* | 0.002 <sup>ξ</sup>  |
| Cholesterol (mg/dL) † | 193.60 (41.37) | 187.37 (32.91) | 1.00 (0.99, 1.01) | 0.286 <sup>ξ</sup>  |

† Variables with normal numeric scales are reported as Mean (standard deviation).

¥ Variables with non-normal numeric scales are reported as Median (25<sup>th</sup>, 75<sup>th</sup>).

<sup>ξ</sup> Independent Samples t- test

<sup>Ⓜ</sup> Mann- Whitney U test

MHAO, Metabolically Healthy Abdominally Obese; MUAO, Metabolically Unhealthy Abdominally Obese; OR, Odds Ratio; CI, Confidence Interval; FBS, Fasting Blood Sugar; TG, Triglycerides; HDL-C, High-Density Lipoprotein Cholesterol; SBP, Systolic Blood Pressure; DBP, Diastolic Blood Pressure

**Table 3.** correlation of FFAs and LBP with metabolic parameters in MUAO and MHAO individuals

| Variables | MUAO          |              | MHAO         |              |
|-----------|---------------|--------------|--------------|--------------|
|           | FFAs          | LBP          | FFAs         | LBP          |
| WC        | 0.07 (0.51)   | 0.02 (0.85)  | 0.06 (0.58)  | 0.03 (0.74)  |
| TG        | -0.02 (0.79)  | 0.008 (0.94) | -0.07 (0.48) | 0.07 (0.49)  |
| FBs       | -0.005 (0.96) | -0.18 (0.09) | 0.07 (0.50)  | 0.09 (0.40)  |
| HDL-C     | 0.01 (0.91)   | 0.08 (0.45)  | 0.10 (0.33)  | 0.41 (0.09)  |
| SBP       | -0.03 (0.78)  | -0.08 (0.46) | -0.05 (0.64) | -0.11 (0.29) |
| DBP       | -0.08 (0.43)  | -0.18 (1.00) | 0.06 (0.58)  | -0.09 (0.39) |

P=NS, using Spearman correlation coefficient test.

MHAO, Metabolically Healthy Abdominally Obese; MUAO, Metabolically Unhealthy Abdominally Obese; FBS, Fasting Blood Sugar; TG, Triglycerides; HDL-C, High-Density Lipoprotein Cholesterol; SBP, Systolic Blood Pressure; DBP, Diastolic Blood Pressure; LBP, Lipopolysaccharide Binding Protein; FFAs, Free Fatty Acids

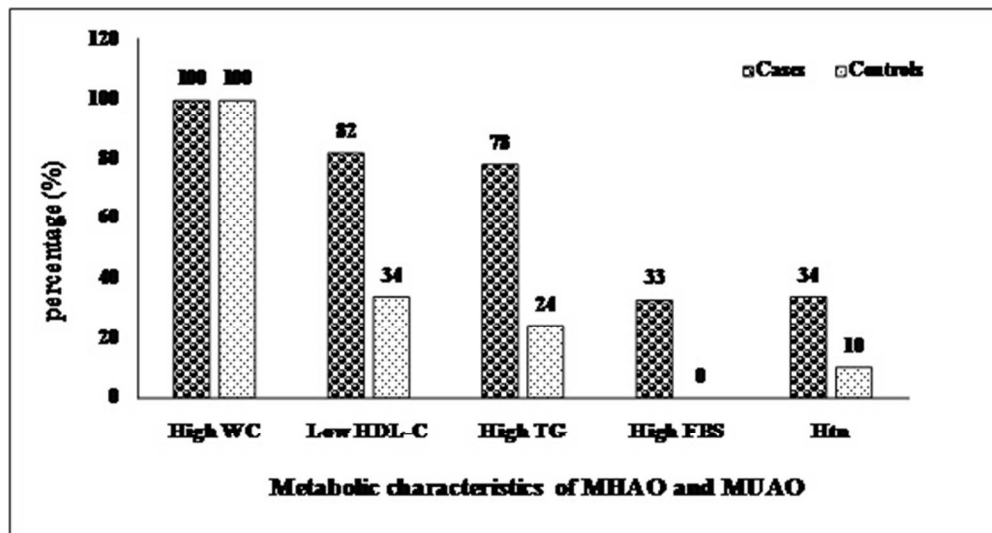

Figure 1. Metabolic characteristics of MHAO and MUAO subjects.  
 P<0.001 for all except WC, using X2.

MHAO, Metabolically Healthy Abdominally Obese; MUAO, Metabolically Unhealthy Abdominally Obese; FBS, Fasting Blood Sugar; TG, Triglycerides; HDL-C, High-Density Lipoprotein Cholesterol; Htn, Hypertension.

157x83mm (96 x 96 DPI)

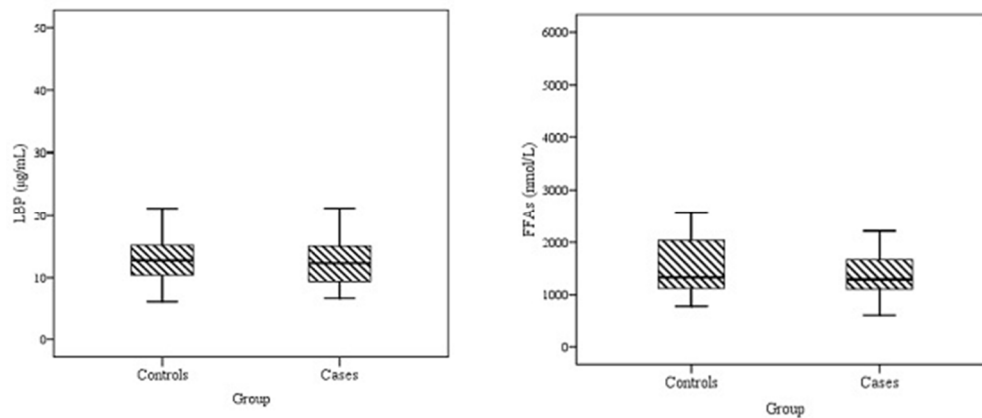

Figure 2. Lipopolysaccharide binding protein (LBP) ( $\mu\text{g/mL}$ ) (a) and free fatty acids (FFAs) concentrations ( $\mu\text{mol/L}$ ) (b) in subjects with MHAO (Controls) and MUAO (Cases).

P=NS

Data are presented as box plot where boxes represent the interquartile range [IQR], the line within boxes represent the median, and the lines outside the boxes represent the lower quartile minus 1.5 times the IQR or the upper quartile plus 1.5 times the IQR.

165x70mm (96 x 96 DPI)

review only

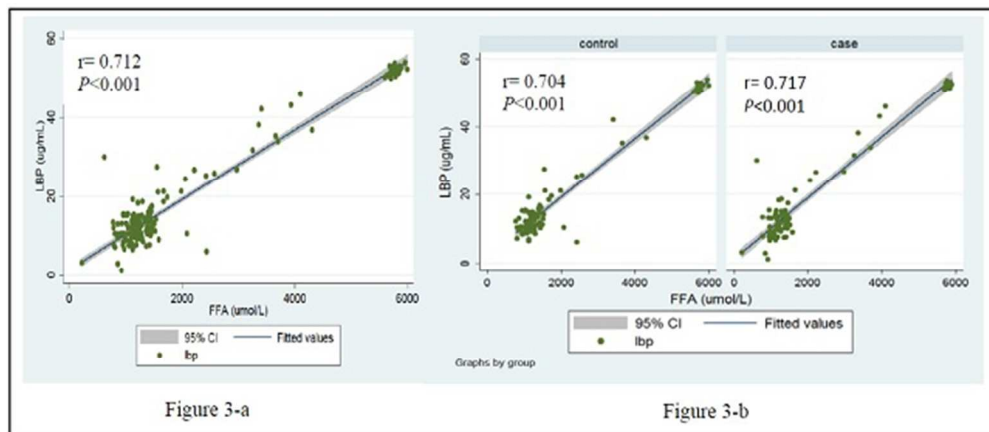

Figure 3. Spearman correlation between LBP and FFAs in pooled population (Fig. 3-a) as well as in each study group (Fig. 3-b).

171x75mm (96 x 96 DPI)

Peer review only

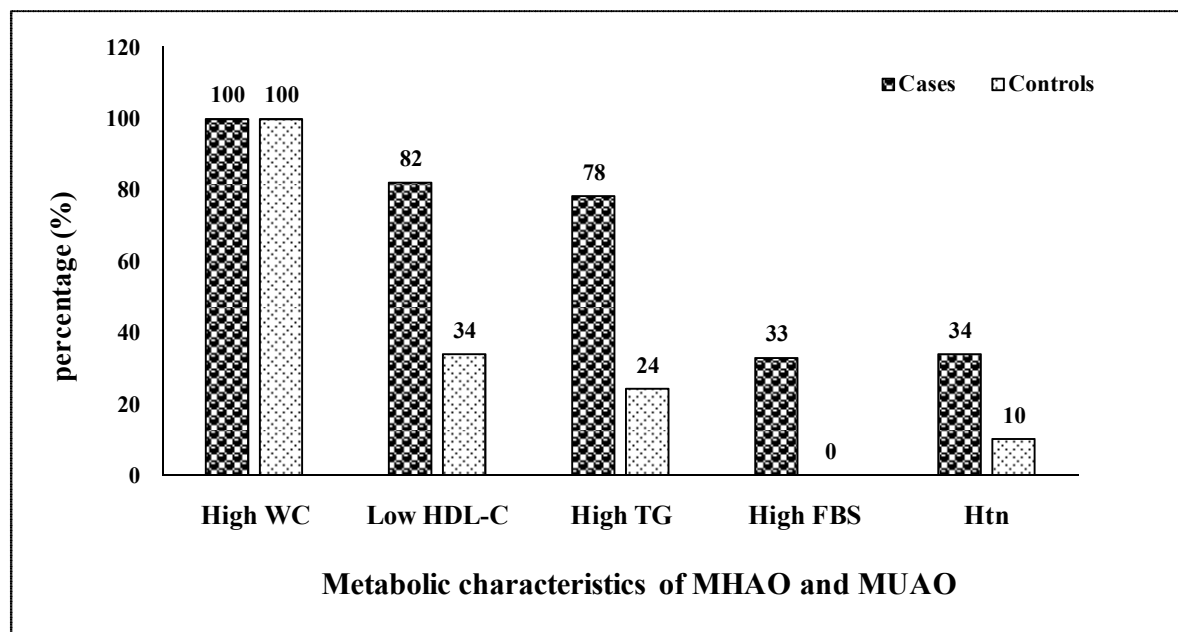

Figure 1. Metabolic characteristics of MHAO and MUAO subjects.

P<0.001 for all except WC, using  $X^2$ .

MHAO, Metabolically Healthy Abdominally Obese; MUAO, Metabolically Unhealthy Abdominally Obese; FBS, Fasting Blood Sugar; TG, Triglycerides; HDL-C, High-Density Lipoprotein Cholesterol; Htn, Hypertension.

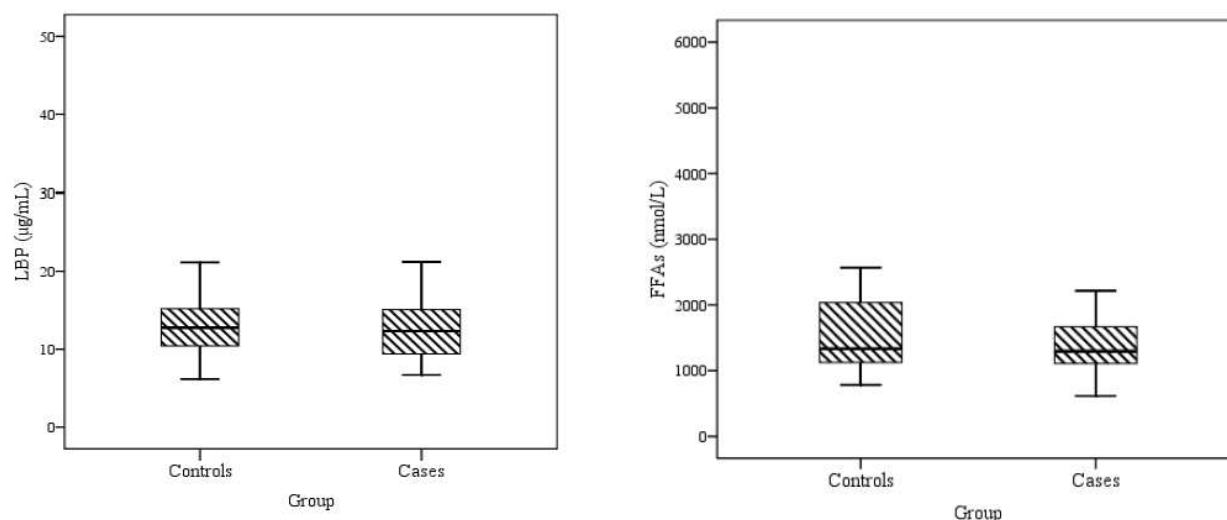

Figure 2. Lipopolysaccharide binding protein (LBP) ( $\mu\text{g/mL}$ ) (a) and free fatty acids (FFAs) concentrations ( $\text{nmol/L}$ ) (b) in subjects with MHAO (Controls) and MUAO (Cases).

$P=\text{NS}$

Data are presented as box plot where boxes represent the interquartile range [IQR], the line within boxes represent the median, and the lines outside the boxes represent the lower quartile minus 1.5 times the IQR or the upper quartile plus 1.5 times the IQR.

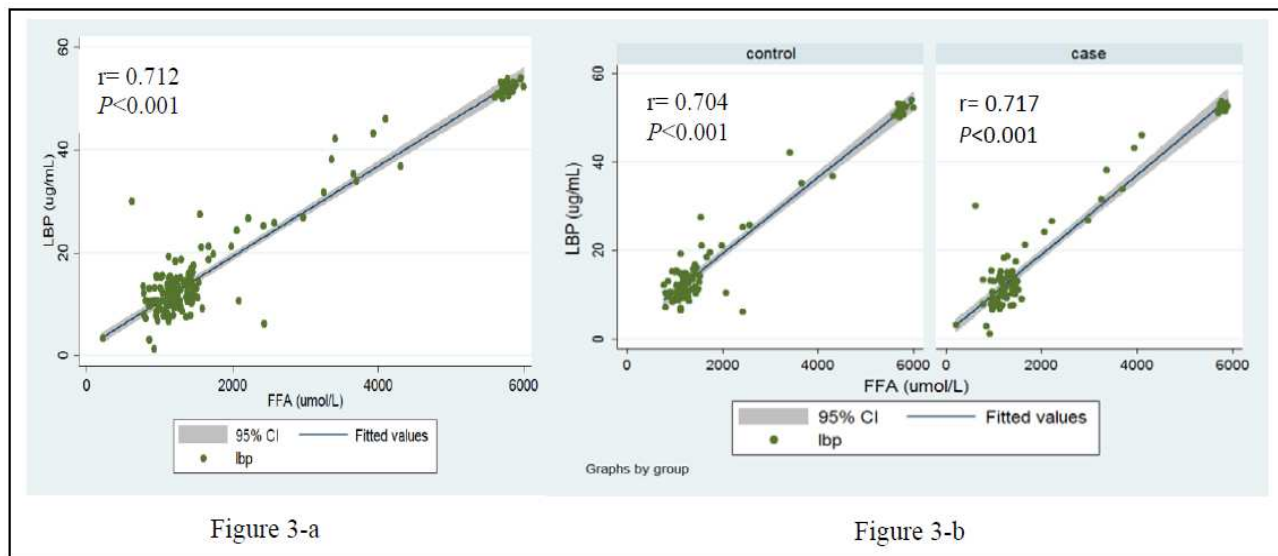

Figure 3. Spearman correlation between LBP and FFAs in pooled population (Fig. 3-a) as well as in each study group (Fig. 3-b).



# BMJ Open

## Association of endotoxemia with serum free fatty acids in metabolically healthy and unhealthy abdominally obese individuals: a case-control study in northwest of Iran

|                                 |                                                                                                                                                                                                                                                                                                                                                                                                                                                                                                                                                                                                                                                                                                                                                                                                                                                                                                                                                                                        |
|---------------------------------|----------------------------------------------------------------------------------------------------------------------------------------------------------------------------------------------------------------------------------------------------------------------------------------------------------------------------------------------------------------------------------------------------------------------------------------------------------------------------------------------------------------------------------------------------------------------------------------------------------------------------------------------------------------------------------------------------------------------------------------------------------------------------------------------------------------------------------------------------------------------------------------------------------------------------------------------------------------------------------------|
| Journal:                        | <i>BMJ Open</i>                                                                                                                                                                                                                                                                                                                                                                                                                                                                                                                                                                                                                                                                                                                                                                                                                                                                                                                                                                        |
| Manuscript ID                   | bmjopen-2017-015910.R1                                                                                                                                                                                                                                                                                                                                                                                                                                                                                                                                                                                                                                                                                                                                                                                                                                                                                                                                                                 |
| Article Type:                   | Research                                                                                                                                                                                                                                                                                                                                                                                                                                                                                                                                                                                                                                                                                                                                                                                                                                                                                                                                                                               |
| Date Submitted by the Author:   | 24-Feb-2017                                                                                                                                                                                                                                                                                                                                                                                                                                                                                                                                                                                                                                                                                                                                                                                                                                                                                                                                                                            |
| Complete List of Authors:       | <p>Saghafi-Asl, Maryam; Tabriz University of Medical Sciences, Nutrition Research Center, Department of Biochemistry and Diet Therapy, School of Nutrition and Food Sciences, Tabriz University of Medical Sciences, Tabriz, Iran</p> <p>Amiri, Parichehr; Tabriz University of Medical Sciences, Student Research Committee, School of Nutrition and Food Sciences, Tabriz University of Medical Sciences, Tabriz, Iran</p> <p>Naghizadeh, Mahsa; Tabriz University of Medical Sciences, Student Research Committee, School of Nutrition and Food Sciences, Tabriz University of Medical Sciences, Tabriz, Iran</p> <p>Ghavami, Seyed Mostafa; Tabriz University of Medical Sciences, Department of Radiology, School of Paramedicine, Tabriz University of Medical Sciences, Tabriz, Iran</p> <p>Karamzad, Nahid; Maragheh University of Medical Sciences, Department of Public Health, School of Nursing and Midwifery, Maragheh University of Medical Sciences, Maragheh, Iran</p> |
| <b>Primary Subject Heading</b>: | Nutrition and metabolism                                                                                                                                                                                                                                                                                                                                                                                                                                                                                                                                                                                                                                                                                                                                                                                                                                                                                                                                                               |
| Secondary Subject Heading:      | Nutrition and metabolism, Public health                                                                                                                                                                                                                                                                                                                                                                                                                                                                                                                                                                                                                                                                                                                                                                                                                                                                                                                                                |
| Keywords:                       | PUBLIC HEALTH, NUTRITION & DIETETICS, Diabetes & endocrinology < INTERNAL MEDICINE                                                                                                                                                                                                                                                                                                                                                                                                                                                                                                                                                                                                                                                                                                                                                                                                                                                                                                     |
|                                 |                                                                                                                                                                                                                                                                                                                                                                                                                                                                                                                                                                                                                                                                                                                                                                                                                                                                                                                                                                                        |

SCHOLARONE™  
Manuscripts

1  
2  
3  
4  
5  
6  
7  
8  
9  
10  
11  
12  
13  
14  
15  
16  
17  
18  
19  
20  
21  
22  
23  
24  
25  
26  
27  
28  
29  
30  
31  
32  
33  
34  
35  
36  
37  
38  
39  
40  
41  
42  
43  
44  
45  
46  
47  
48  
49  
50  
51  
52  
53  
54  
55  
56  
57  
58  
59  
60

# Association of endotoxemia with serum free fatty acids in metabolically healthy and unhealthy abdominally obese individuals: a case-control study in northwest of Iran

Maryam Saghafi-Asl<sup>1</sup>, Parichehr Amiri<sup>2</sup>, Mahsa Naghizadeh<sup>2</sup>, Seyed Mostafa Ghavami<sup>3</sup>, Nahid Karamzad<sup>4,\*</sup>

<sup>1</sup> Nutrition Research Center, Department of Biochemistry and Diet Therapy, School of Nutrition and Food Sciences, Tabriz University of Medical Sciences, Tabriz, Iran

<sup>2</sup> Student Research Committee, School of Nutrition and Food Sciences, Tabriz University of Medical Sciences, Tabriz, Iran

<sup>3</sup> Department of Radiology, School of Paramedicine, Tabriz University of Medical Sciences, Tabriz, Iran

<sup>4</sup> Department of Public Health, School of Nursing and Midwifery, Maragheh University of Medical Sciences, Maragheh, Iran

**Running Title:** Association of endotoxemia with serum free fatty acids

**\*Corresponding Author:** Nahid Karamzad, Department of Public Health, School of Nursing and Midwifery, Maragheh University of Medical Sciences, Maragheh, Iran.

**E-mail address:** nahidkaramzad@gmail.com

## Association of endotoxemia with serum free fatty acids in metabolically healthy and unhealthy abdominally obese individuals: a case-control study in northwest of Iran

### Abstract

**Objectives:** This study was aimed to compare serum free fatty acids (FFAs) and lipopolysaccharide binding protein (LBP) between metabolically healthy abdominally obese (MHAO) and metabolically unhealthy abdominally obese (MUAO) individuals. We also examined the association between serum FFAs and LBP in the participants.

**Methods:** In this age- and gender-matched case-control study, 164 abdominally obese subjects were recruited from June to November, 2015 in the Northwest of Iran. Demographic data, dietary intake, body composition, anthropometric indices, and physical activity were assessed. Basal blood samples were collected to determine serum metabolic parameters, FFAs, and LBP. Abdominal obesity was defined as having waist circumference (WC)  $\geq$  95cm. Those with 3 or more metabolic alterations were defined as MUAO and those having 2 or less were classified as MHAO. Data were analyzed using SPSS ver. 17.0.

**Results:** There were no significant differences in dietary intake, anthropometric indices, body composition, and physical activity between the two groups. The odds of MUAO significantly increased by increments in serum fasting blood sugar (OR= 3.79, 95 % CI: 2.25-6.40), TG (OR= 1.10, 95 % CI: 1.05-1.15), systolic blood pressure (OR= 1.02, 95 % CI: 1.00-1.04), and diastolic blood pressure (OR= 1.03, 95 % CI: 1.01-1.06) and decreased by increase in serum high-density lipoprotein- cholesterol (OR= 0.32, 95 % CI: 0.20-0.52). The levels of LBP and FFAs showed no significant differences between the two groups. However, significant correlations were found between LBP and FFAs in pooled population ( $r=0.712$ ;  $P<0.001$ ) as well as in cases ( $r=0.717$ ;  $P<0.001$ ) and controls ( $r=0.704$ ;  $P<0.001$ ). Neither FFAs nor LBP were significantly correlated with dietary intake or metabolic parameters ( $p>0.05$ ).

1 **Conclusion:** The results indicated that serum LBP and FFAs are highly correlated both in MHAO and MUAO  
2 states. In addition, the levels of LBP and FFAs seem to be more related to abdominal obesity than to the  
3 presence or absence of metabolic health.  
4  
5  
6  
7

8 **Key words:** free fatty acids; lipopolysaccharide binding protein; metabolic health; abdominal obesity  
9  
10  
11  
12  
13  
14  
15  
16

### 17 **Strengths and limitations of this study**

- 18  
19  
20 1) The association of LBP and FFAs levels in MHAO and MUAO individuals for the first time and found  
21 significant differences between the two parameters.  
22  
23 2) This was a case-control study in which causality could not be assessed.  
24  
25 3) Insulin levels were not measured in our study population; therefore, insulin resistance was not studied.  
26  
27 4) The present work was carried out on volunteer participants. Though all volunteers were randomly  
28 recruited from general population after public announcement and based on the eligible criteria.  
29  
30  
31  
32  
33  
34  
35  
36  
37  
38  
39  
40  
41  
42  
43  
44  
45  
46  
47  
48  
49  
50  
51  
52  
53  
54  
55  
56  
57  
58  
59  
60

## Introduction

1  
2  
3 Obesity is increasingly prevalent worldwide<sup>1</sup>. There are well-established health consequences of obesity  
4 such as type 2 diabetes, metabolic syndrome (MetS), and cardiovascular disease<sup>2</sup>. However, not all obese  
5 people are at higher risk of metabolic diseases. In a subtype of obese persons, described as “metabolically  
6 healthy obese (MHO)”, the obese phenotype may exist devoid of metabolic dysfunction<sup>3</sup>. Despite there is  
7 still no uniform definition for MHO, it is thought to account for approximately one fifth of the obese  
8 population<sup>4</sup>.

9  
10  
11  
12  
13  
14  
15  
16  
17  
18 Evidence increasingly identifies inflammation as a potential mechanism linking adiposity especially  
19 abdominal fat and metabolic dysfunction<sup>5</sup>. However, published results are rare and conflicting regarding  
20 the role of inflammation in the metabolic differences observed between metabolically healthy and  
21 unhealthy individuals<sup>6-7</sup>. Studies on postmenopausal obese women suggest that the MHO may have more  
22 favorable inflammatory profiles<sup>8</sup> and less visceral fat<sup>9</sup> than their counterparts with insulin resistance (IR)  
23 and other metabolic abnormalities<sup>10</sup>. In contrast, another study<sup>11</sup> reported that MHO women displayed  
24 abnormal levels of inflammatory profile, despite not having increased 10-year risk of cardiovascular  
25 disease.

26  
27  
28  
29  
30  
31  
32  
33  
34  
35  
36  
37 Basic mechanism accounted for inflammation in adipose tissue is still unknown, but some factors including  
38 plasma free fatty acids (FFAs) are suggested<sup>12</sup>. It was clarified that plasma FFAs are increased among the  
39 obese as they are released from inflamed adipose tissue<sup>13</sup> and through the lipolysis of adipocytes<sup>14</sup>.  
40  
41  
42 However, little is known about the contribution of FFAs to the development of inflammation in obesity.  
43  
44  
45 Therefore, examining the association of FFAs with inflammatory markers seems to be warranted.

46  
47  
48  
49  
50 Lipopolysaccharide (LPS) molecules, also known as bacterial endotoxins, may trigger inflammation, leading  
51 to activation of immunity and cytokine release. LPS infusion and consequent subclinical endotoxemia  
52 results in elevated levels of proinflammatory markers and metabolic aberrations<sup>15-16</sup>. LPS has a short half-  
53 life<sup>17</sup> and there is no agreement on the measurement of its plasma level<sup>18</sup>. Hence, lipopolysaccharide-

1 binding protein (LBP) is introduced with longer half-life and more reliable measurement <sup>19-20</sup>. Also, serum  
2 LBP level is a proxy of serum LPS level <sup>21</sup>. A population-based study <sup>22</sup> found that LBP was significantly  
3 associated with MetS in normal-weight participants. Another study <sup>23</sup> reported that among MetS  
4 components, LBP concentration was independently associated with abdominal obesity.  
5  
6  
7  
8

9  
10 In prior studies, inflammatory parameters were compared between obese and lean subjects <sup>19, 24-25</sup>.  
11 Therefore, it remains unclear whether the observed alterations in serum FFAs and/or inflammatory  
12 parameters in metabolically unhealthy obese patients are due to adiposity and/or metabolic state.  
13 Therefore, regarding the significant confounding effect of abdominal obesity, we used waist circumference  
14 (WC), as a reflection of visceral adipose tissue <sup>26</sup>, to define abdominal obesity, and examined differences in  
15 characteristics and inflammatory markers (serum LBP and FFAs) between “metabolically healthy” and  
16 “unhealthy” abdominally obese individuals. We also examined the association between serum FFAs and  
17 LBP in pooled population as well as in each group.  
18  
19  
20  
21  
22  
23  
24  
25  
26  
27  
28  
29

## 30 **Methods**

### 31 **Study design and participants**

32  
33 A total of 81 metabolically healthy abdominally obese (MHAO) with 83 age- and gender-matched  
34 metabolically unhealthy abdominally obese (MUHAO) were recruited in this case-control study, carried out  
35 from June 15<sup>th</sup> to November 6<sup>th</sup>, 2015 in the Northwest of Iran. Frequency matching was carried out for the  
36 present study. Apparently healthy individuals aged 18-60 years with abdominal obesity were included in  
37 the study. We excluded pregnant or lactating women, those with diarrhea for 3 consecutive days within  
38 the previous 3 months, diagnosed diabetes, coronary heart disease, stroke, myocardial infarction,  
39 cardiovascular and kidney, liver or infectious diseases including tuberculosis, AIDS, and hepatitis; thyroid  
40 problems, severe mental disorders or physical disabilities and malignancies; taking oral antidiabetic agents  
41 or insulin or other drugs for the last 2 months, or antibiotics used for 3 consecutive days within the  
42  
43  
44  
45  
46  
47  
48  
49  
50  
51  
52  
53  
54  
55  
56  
57  
58  
59  
60

1  
2  
3  
4  
5  
6  
7  
8  
9  
10  
11  
12  
13  
14  
15  
16  
17  
18  
19  
20  
21  
22  
23  
24  
25  
26  
27  
28  
29  
30  
31  
32  
33  
34  
35  
36  
37  
38  
39  
40  
41  
42  
43  
44  
45  
46  
47  
48  
49  
50  
51  
52  
53  
54  
55  
56  
57  
58  
59  
60

previous 3 months; smokers or alcohol consumers; misreported dietary intakes (less than 800 kcal/d or more than 4200 kcal/d), or being on specific diets in the past 6 months; and having gastrointestinal surgery within past 1 year.

Abdominal obesity was defined as having waist circumference (WC)  $\geq 95$  cm according to the Iranian National Committee of Obesity <sup>27</sup>. According to Meigs *et al.* <sup>28</sup>, metabolic health was defined as the presence of  $< 3$  of the following metabolic abnormalities including abdominal obesity (WC  $\geq 95$  cm for both genders) <sup>27</sup>; high serum triglyceride (TG) concentration ( $\geq 150$  mg/dL); low serum high density lipoprotein cholesterol (HDL-C) ( $< 40$  mg/dL for men and  $< 50$  mg/dL for women); elevated blood pressure (BP) ( $\geq 130/85$  mmHg); and fasting blood sugar (FBS) ( $\geq 100$  mg/dL). Eighty-one individuals with  $\geq 3$  criteria entered the case group (MUAO) and 83 with 2 or less criteria formed the control group (MHAO).

### Sampling procedures

After public announcement for the study, 500 volunteers were recruited from general population. Of these, 178 people could enter the study based on the defined eligibility criteria for the present study. Informed consent was taken from each participant before the study. After taking blood samples and anthropometric measurements, 14 of them were excluded due to diabetes (FBS  $\geq 126$  mg/dl <sup>29</sup> in two occasions), leaving 164 people (82 men, 82 women) to conduct the research.

### Biochemical assays

After a 12-h overnight fast, 5cc blood were obtained for serum analyses. After centrifugation at 3000 rpm for 5 min, metabolic parameters were analyzed immediately, but serum FFAs and LBP were analyzed after supplying in  $-80^{\circ}\text{C}$ .

FBS was measured by the enzymatic colorimetric method using glucose oxidase. Serum TG concentration was measured by commercially available enzymatic reagents with glycerol phosphate oxidase. Serum HDL-C was measured after precipitation of the apolipoprotein B containing lipoproteins with phosphotungstic

1 acid. Assays were performed using Pars Azmoon kits (Pars Azmoon Inc., Tehran, Iran) and a Selectra 2 auto-  
2 analyzer (Vital Scientific, Spankeren, Netherlands). Inter- and intra- assay coefficient of variation (CV)  
3 was < 5% for all assays. Serum samples for both LBP and FFAs assays were stored at -80°C until analysis.  
4  
5 Both serum LBP and FFAs levels were determined by a sandwich ELISA (Bioassay Technology Laboratory,  
6  
7 Shanghai Korean Biotech Co., LTD; Shanghai City, China) according to the manufacturer's instructions. The  
8  
9 intra-assay and inter-assay coefficients of variation were <8 and <10%, respectively.  
10  
11  
12  
13

## 14 **Measurements**

15  
16  
17 All anthropometric indices were measured by a trained researcher. Height (without shoes in standard  
18 situation with precision of 0.1 cm and with an inelastic measuring tape) and weight (with Seca scale, light  
19 clothes and precision of 0.1 kg) were measured and BMI was calculated as weight in kg divided by the  
20 square of height in meters<sup>30</sup>. WC was measured using a non-stretchable fiber measuring tape. The subjects  
21  
22 were asked to stand erect in relaxed position with both feet together on flat surface. WC was measured as  
23  
24 the smallest horizontal girth between the costal and iliac crests at minimal respiration. Hip circumference  
25  
26 was taken as the greatest circumference at the level of greater trochanters (the widest portion of the hip)  
27  
28 on both sides. Waist to hip ratio (WHR) was calculated by dividing WC (cm) by hip circumference (cm)<sup>31</sup>.  
29  
30 BP was recorded in a comfortable sitting position in the left arm after at least a 5-min rest, using the  
31  
32 mercury sphygmomanometer. Two measurements were taken and the mean of the two measurements  
33  
34 was considered as the BP<sup>32</sup>. Bioelectrical Impedance Analysis (BIA: BC-418MA, Tanita, Japan) was used to  
35  
36 describe fat percent, fat Mass (FM), and fat free mass (FFM). Dietary intake was assessed using a 3-day  
37  
38 food record (one weekend day and two workdays). *Nutritionist IV* software (Axxya Systems, Stafford, TX),  
39  
40 modified for Iranian foods, were used for dietary data analysis. Physical activity (PA) was measured via  
41  
42 IPAQ-long form questionnaire<sup>33</sup>.  
43  
44  
45  
46  
47  
48  
49  
50  
51  
52

## 53 **Statistical analysis and sample size**



1 To examine the normal distribution of variables, Kolmogorov-Smirnov tests and histograms were applied.  
2  
3 The independent samples t-test was used to compare the means (SD) of normally distributed variables  
4  
5 between the two groups. The Mann-Whitney U test was used for values with skewed distribution and in  
6  
7 such conditions, median (25<sup>th</sup>, 75<sup>th</sup>) was reported. In order to assess the association of two categorical  
8  
9 variables, Chi-square test was applied. The correlation between serum FFAs and LBP was assessed using  
10  
11 Spearman correlation coefficient analysis. Odds ratios and their 95% confidence intervals (CI) were  
12  
13 reported using Logistic Regression test.  
14  
15

16  
17 The larger sample size was calculated for serum FFAs compared to LBP, using literature-derived data<sup>34</sup> for  
18  
19 nonalcoholic fatty liver disease (NAFLD) patients; the effect size for serum FFAs was 0.20 nmol/l (SD1=0.34  
20  
21 nmol/l and SD2=0.53 nmol/l). Therefore, sample size estimation was based upon this parameter with 80%  
22  
23 power and  $\alpha$ -error of 5% and a case to control ratio of 1:1. It was predicted that 79 persons in each group  
24  
25 would detect changes in serum FFAs as well as serum LBP level, using the two-means formula. Data were  
26  
27 analyzed using SPSS ver. 17.0 for Windows (PASW Statistics; SPSS Inc., Chicago, IL, USA). P-value less than  
28  
29 0.05 was considered significant.  
30  
31  
32  
33

## 34 Results

35  
36  
37 Males comprised about 50% of the study participants in the two groups ( $p=0.87$ ). The age range of the  
38  
39 subjects was 20-59 years. Participants of the two study groups similarly had WC $\geq$ 95 cm i.e. the cut-off  
40  
41 point of WC for Iranian population. Overall, there were no significant differences in age, gender,  
42  
43 anthropometric indices, and body composition between the two groups. Dietary parameters especially  
44  
45 total fat, saturated fatty acids (SFA), monounsaturated fatty acids (MUFA), polyunsaturated fatty acids  
46  
47 (PUFA) intakes were more or less the same between the two study groups (Table 1). Marital status,  
48  
49 education level, and job of the cases and controls were also similar. However, mean number of metabolic  
50  
51 aberrations were significantly higher in cases than controls ( $3.25\pm 0.72$  vs.  $1.67\pm 0.50$ ;  $P<0.001$ ) (data not  
52  
53 shown). The flow chart of the study is shown in Figure 1.  
54  
55  
56  
57  
58  
59  
60

1 Except for WC which was matched between the two groups, metabolic aberrations including low HDL-C  
2 (82% vs. 34%), high TG (78% vs. 24%), high FBS (33% vs. 0%), and hypertension (34% vs. 10%) were  
3 significantly higher in the cases than controls, respectively (Figure 2). The current study indicated that each  
4 10 unit increment in serum FBS level increased the risk of MUAO about 3.8 times (OR= 3.79, 95 % CI: 2.25-  
5 6.40). Additionally, the odds of MUAO was significantly increased per one increment in serum TG level  
6 (OR= 1.10, 95 % CI: 1.05-1.15), the systolic BP (OR= 1.02, 95 % CI: 1.00-1.04), and diastolic BP (OR= 1.03, 95  
7 % CI: 1.01-1.06). However, the odds of having MUAO was significantly decreased by 68% per 10 unit  
8 increment in serum HDL-C level (OR= 0.32, 95 % CI: 0.20-0.52) (Table 2).

9  
10  
11  
12  
13  
14  
15  
16  
17  
18  
19  
20 The median of LBP (12.32 µg/mL in cases vs. 12.76 µg/mL in controls,  $P=0.483$ ) and FFAs (1294 nmol/L in  
21 cases vs. 1333 nmol/L in controls;  $P=0.686$ ) showed no significant difference between the two groups  
22 (Figure 3). However, a significant correlation was found between LBP and FFAs in pooled population  
23 (Figure 3). However, a significant correlation was found between LBP and FFAs in pooled population  
24 ( $r=0.712$ ;  $P<0.001$ ) as well as in cases ( $r=0.717$ ;  $P<0.001$ ) and controls ( $r=0.704$ ;  $P<0.001$ ) (Figure 4). The  
25 results of partial correlation indicated much stronger correlation between LBP and FFAs, when controlling  
26 for WC ( $r=0.961$ ;  $P<0.001$ ). Moreover, number of metabolic aberrations were significantly correlated with  
27 HDL-C ( $r=-0.537$ ;  $P<0.001$ ), TG ( $r=0.468$ ;  $P<0.001$ ), FBS ( $r=0.534$ ;  $P<0.001$ ), Systolic BP ( $r=0.247$ ;  $P=0.001$ ),  
28 and Diastolic BP ( $r=0.315$ ;  $P<0.001$ ). Neither FFAs nor LBP were significantly correlated with dietary intake  
29 of total fat, SFA, MUFA, and PUFA (data not shown). There were also no significant correlations of LBP and  
30 FFAs with metabolic parameters (Table 3).

## 41 Discussion

42  
43  
44  
45  
46  
47 The present study, to the best of our knowledge, examined the association of LBP and FFAs levels in MHAO  
48 and MUAO individuals for the first time and found significant differences between the two parameters.  
49 Anthropometric indices as well as body composition profile were similar between the two groups.  
50 Moreover, there were no significant differences in LBP and FFAs between MHAO and MUAO.  
51  
52  
53  
54  
55  
56  
57  
58  
59  
60

1  
2  
3  
4  
5  
6  
7  
8  
9  
10  
11  
12  
13  
14  
15  
16  
17  
18  
19  
20  
21  
22  
23  
24  
25  
26  
27  
28  
29  
30  
31  
32  
33  
34  
35  
36  
37  
38  
39  
40  
41  
42  
43  
44  
45  
46  
47  
48  
49  
50  
51  
52  
53  
54  
55  
56  
57  
58  
59  
60

In the present study, we matched metabolically healthy with metabolically unhealthy individuals on abdominal fat which might explain why we did not find any differences in levels of FFAs and LBP, as inflammatory markers, and body composition between the two groups. Therefore, the levels of LBP and FFAs seem to be more related to abdominal obesity than to the presence or absence of metabolic health. This is further supported by the observation that serum FFAs or LBP levels were not correlated with metabolic parameters. Therefore, our findings suggest that increased levels of these two markers are not necessarily related to the presence of metabolic aberrations.

A few smaller studies have examined differences in body composition and/or inflammatory profile between metabolically healthy and unhealthy obese postmenopausal women<sup>35-37</sup>. In line with our result, Engström *et al.*<sup>36</sup> in a research on 58 obese postmenopausal women found no significant differences in levels of inflammatory markers between those with metabolic syndrome (MetS) compared to those without MetS. Additionally, in the population-based study of Philips *et al.*<sup>38</sup>, no significant difference was noted in CRP level between MHAO and MUAO, based on metabolic health criteria of Meigs *et al.*<sup>28</sup> study. It is noteworthy that in the present study we used Meigs's metabolic health definition in which WC has also been considered.

A recent study revealed that the association between inflammatory biomarkers and metabolically healthy obesity depends on the criteria used. Since in that research, a significant difference was noted in the levels of CRP and IL-6 with some but not all MHAO definitions, which disappeared after adjustment for abdominal obesity or percent body fat<sup>39</sup>. This study confirms our results. However, Phillips *et al.*<sup>40</sup> showed that obese women and men with MetS had significantly higher levels of inflammatory cytokines than obese persons without MetS. Beasley *et al.*<sup>41</sup> showed that visceral adiposity, and not abdominal subcutaneous fat, was most consistently associated with significantly higher levels of IL-6 and CRP levels in black and white men and women in the Health ABC study. We could not measure visceral fat in our study, though, abdominal obesity measured through WC, can reflect visceral adiposity<sup>26</sup>. On the other hand, a recent

1 work observed no significant differences in visceral fat between the obese-insulin resistant and obese-  
2 insulin sensitive persons <sup>42</sup>.  
3

4 Several studies have demonstrated a strong association of IR with obesity, low HDL-C,  
5 hypertriglyceridemia, and hypertension <sup>10, 43</sup> as well as inflammatory factors <sup>44</sup>. However, in our study, we  
6 could not assess IR, due to some financial deficits.  
7  
8  
9  
10

11 In the present work, dietary intake was compared between the two obese groups; therefore, no significant  
12 difference was found in terms of energy or macronutrients especially fat intake. Moreover, habitual  
13 physical activity (PA) was controlled between the study groups. And, in our previous report, there were no  
14 significant differences between the two groups in terms of PA (unpublished data). Since different levels of  
15 habitual PA might affect levels of serum inflammatory markers <sup>45</sup>.  
16  
17  
18  
19  
20  
21  
22  
23  
24

25 Obesity, as a well-known metabolic risk factor, is usually associated with mild chronic inflammation <sup>46</sup>. The  
26 relationship between obesity and increased inflammation may be justified, in part, by FFAs <sup>47</sup> which are  
27 released from adipocytes through lipolysis and are elevated in obesity due to increased adipose tissue <sup>48</sup>.  
28 Inflammatory cytokines such as interleukin-6 (IL-6) can stimulate lipolysis and increase levels of FFAs <sup>49</sup>. On  
29 the other hand, in healthy persons an acute increase in FFAs can induce inflammatory changes <sup>50</sup>.  
30 Therefore, FFAs are not only increased by inflammation, but also promote inflammation. The results of the  
31 present research showed that FFAs are positively correlated with LBP levels either in the pooled population  
32 or in each group. It shows that any increase in the level of FFAs, observed in the abdominally obese,  
33 regardless of their metabolic aberrations can lead to a significant elevation in the level of LBP.  
34  
35  
36  
37  
38  
39  
40  
41  
42  
43  
44  
45  
46

47 LBP has been considered a key inflammatory marker which mediates LPS-triggered innate immunity <sup>51</sup>.  
48 Although LBP concentration was previously reported to be associated with various anthropometric and  
49 metabolic factors such as BMI, WC, and so on <sup>23-25</sup>, in our study the relationship only existed between the  
50 two biomarkers, FFAs and LBP, but not with the metabolic or anthropometric parameters. It is notable that  
51 the positive relationship between LBP and BMI was not observed in either normal weight or obese groups  
52  
53  
54  
55  
56  
57  
58  
59  
60

1  
2  
3  
4  
5  
6  
7  
8  
9  
10  
11  
12  
13  
14  
15  
16  
17  
18  
19  
20  
21  
22  
23  
24  
25  
26  
27  
28  
29  
30  
31  
32  
33  
34  
35  
36  
37  
38  
39  
40  
41  
42  
43  
44  
45  
46  
47  
48  
49  
50  
51  
52  
53  
54  
55  
56  
57  
58  
59  
60

in Yang *et al.*<sup>52</sup> study after multivariate analyses. In their research, the level of LBP significantly reduced after bariatric surgery and consequent reduction in WC (from 121.6 cm to 90.6 cm;  $P < 0.001$ ) which indicates the strong association of LBP with WC. Liu *et al.*<sup>22</sup> in a population-based follow-up study on 2529 Chinese also found that the association of LBP with MetS was significant only in normal-weight participants, but not in their overweight/obese counterparts after multivariate adjustments including BMI, which supports our study findings. It is assumed that the association between serum LBP level and MetS observed in previous studies<sup>19, 24-25</sup> is mediated by BMI or WC, and finding no association between serum LBP level and incidence of MetS in our study, in which the WC-matched controls were included, is not unexpected.

Overall, what makes our research different from most of previous ones is that in our study we matched the two groups based on WC, rarely observed in prior reports. Most of the previous studies have examined either MetS patients vs. those without the syndrome or metabolically healthy vs. metabolically unhealthy, regardless of their BMI or WC status and based on different metabolic health criteria<sup>3, 8, 28</sup>. A few have examined inflammatory markers between metabolically healthy and unhealthy persons, considering WC or abdominal obesity<sup>36, 38, 39</sup>.

## Conclusion

Our study indicated that WC could be a strong mediator of the association between serum LBP, FFAs, and metabolic alterations. In fact, the levels of LBP and FFAs seem to be more related to abdominal obesity than to the presence or absence of metabolic health. The results also suggested a significant correlation between serum FFAs and LBP in abdominally obese population, which seems to be independent of metabolic aberrations.

## Competing interests:

1 The authors have none to declare.

2  
3 **Authors' contributions**

4  
5  
6 MSA and NK conceived the study design and wrote the study protocol. MSA and NK analyzed and  
7  
8 interpreted the data. MSA, PA, MN, SMG and NK were involved in drafting the manuscript or revising it  
9  
10 critically for content. All authors have given final approval of the version to be published.  
11  
12

13  
14  
15  
16  
17 **Acknowledgments** We would like to thank those who participated in the present study.  
18

19  
20 **Ethical approval**

21  
22  
23 All protocols were approved by regional and organizational ethics committee of TBZMED and MRGUMS,  
24  
25 respectively. Written informed consent was taken from each participant. Research was carried out in  
26  
27 compliance with the Helsinki Declaration.  
28  
29

30  
31  
32  
33 **Consent for publication**

34  
35  
36 Not applicable.  
37  
38

39  
40 **Funding**

41  
42  
43 This work was financially supported by Research Vice-Chancellor, Tabriz University of Medical Sciences and  
44  
45 Maragheh University of Medical Sciences, Iran. The results of this paper were extracted from MSc. Thesis  
46  
47 of Nahid Karamzad, registered at Tabriz University of Medical Sciences.  
48  
49

50  
51 **References**

52  
53  
54 1. Kelly T, Yang W, Chen C-S, Reynolds K and He J. Global burden of obesity in 2005 and projections to 2030. *Int*  
55  
56 *J Obes.* 2008; 32: 1431-7.  
57

2. Malik VS, Willett WC and Hu FB. Global obesity: trends, risk factors and policy implications. *Nat Rev Endocrinol.* 2013; 9: 13-27.
3. Karelis A and Rabasa-Lhoret R. Inclusion of C-reactive protein in the identification of metabolically healthy but obese (MHO) individuals. *Diabetes Metab.* 2008; 34: 183-4.
4. Primeau V, Coderre L, Karelis A, et al. Characterizing the profile of obese patients who are metabolically healthy. *Int J Obes.* 2011; 35: 971-81.
5. Hotamisligil GS. Inflammation and metabolic disorders. *Nature.* 2006; 444: 860-7.
6. Desai MY, Dalal D, Santos RD, Carvalho JA, Nasir K and Blumenthal RS. Association of body mass index, metabolic syndrome, and leukocyte count. *Am J Cardiol.* 2006; 97: 835-8.
7. Guilder GP, Hoetzer GL, Greiner JJ, Stauffer BL and DeSouza CA. Influence of metabolic syndrome on biomarkers of oxidative stress and inflammation in obese adults. *Obesity.* 2006; 14: 2127-31.
8. Messier V, Karelis AD, Prud'homme D, Primeau V, Brochu M and Rabasa-Lhoret R. Identifying metabolically healthy but obese individuals in sedentary postmenopausal women. *Obesity.* 2010; 18: 911-7.
9. Messier V, Karelis AD, Robillard M-È, et al. Metabolically healthy but obese individuals: relationship with hepatic enzymes. *Metabolism.* 2010; 59: 20-4.
10. Karelis AD, Faraj M, Bastard J-P, et al. The metabolically healthy but obese individual presents a favorable inflammation profile. *J Clin Endocrinol Metab.* 2005; 90: 4145-50.
11. Wildman RP, Kaplan R, Manson JE, et al. Body size phenotypes and inflammation in the Women's Health Initiative Observational Study. *Obesity.* 2011; 19: 1482-91.
12. Ye J. Emerging role of adipose tissue hypoxia in obesity and insulin resistance. *Int J Obes.* 2008; 33: 54-66.
13. Karpe F, Dickmann JR and Frayn KN. Fatty acids, obesity, and insulin resistance: time for a reevaluation. *Diabetes.* 2011; 60: 2441-9.
14. Boden G. Role of fatty acids in the pathogenesis of insulin resistance and NIDDM. *Diabetes.* 1997; 46: 3-10.
15. Laugerette F, Vors C, Peretti N and Michalski M-C. Complex links between dietary lipids, endogenous endotoxins and metabolic inflammation. *Biochimie.* 2011; 93: 39-45.
16. Mehta NN, McGillicuddy FC, Anderson PD, et al. Experimental endotoxemia induces adipose inflammation and insulin resistance in humans. *Diabetes.* 2010; 59: 172-81.
17. Munford RS. Invited review: Detoxifying endotoxin: time, place and person. *J Endotoxin res.* 2005; 11: 69-84.
18. Amar J, Burcelin R, Ruidavets JB, et al. Energy intake is associated with endotoxemia in apparently healthy men. *Am J clin Nutr.* 2008; 87: 1219-23.
19. Albillos A, de la Hera A, González M, et al. Increased lipopolysaccharide binding protein in cirrhotic patients with marked immune and hemodynamic derangement. *Hepatology.* 2003; 37: 208-17.
20. Ruiz AG, Casafont F, Crespo J, et al. Lipopolysaccharide-binding protein plasma levels and liver TNF-alpha gene expression in obese patients: evidence for the potential role of endotoxin in the pathogenesis of non-alcoholic steatohepatitis. *Obes Surg.* 2007; 17: 1374-80.
21. Romani J, Caixàs A, Escoté X, et al. Lipopolysaccharide-binding protein is increased in patients with psoriasis with metabolic syndrome, and correlates with C-reactive protein. *Clin Exp Dermatol.* 2013; 38: 81-4.
22. Liu X, Lu L, Yao P, et al. Lipopolysaccharide binding protein, obesity status and incidence of metabolic syndrome: a prospective study among middle-aged and older Chinese. *Diabetologia.* 2014; 57: 1834-41.
23. Gonzalez-Quintela A, Alonso M, Campos J, Vizcaino L, Loidi L and Gude F. Determinants of serum concentrations of lipopolysaccharide-binding protein (LBP) in the adult population: the role of obesity. *PLoS One.* 2013; 8: e54600.
24. Moreno-Navarrete J, Ortega F, Serino M, et al. Circulating lipopolysaccharide-binding protein (LBP) as a marker of obesity-related insulin resistance. *Int J obes.* 2012; 36: 1442-9.
25. Sun L, Yu Z, Ye X, et al. A marker of endotoxemia is associated with obesity and related metabolic disorders in apparently healthy Chinese. *Diabetes care.* 2010; 33: 1925-32.
26. Kuk JL, Lee S, Heymsfield SB and Ross R. Waist circumference and abdominal adipose tissue distribution: influence of age and sex. *Am J clin Nutr.* 2005; 81: 1330-4.
27. Azizi F, Khalili D, Aghajani H, et al. Appropriate waist circumference cut-off points among Iranian adults: the first report of the Iranian National Committee of Obesity. *Arch Iranian Med.* 2010; 13: 243.
28. Meigs JB, Wilson PW, Fox CS, et al. Body mass index, metabolic syndrome, and risk of type 2 diabetes or cardiovascular disease. *J Clin Endocrinol Metab.* 2006; 91: 2906-12.

29. Moradi S, Keshavarzi A and Tabatabaee S-M. Is Stress Hyperglycemia a Predicting Factor of Developing Diabetes in Future? *Exp Clin Endocrinol Diabetes*. 2015; 123: 614-6.
30. Mirmiran P, Esmailzadeh A and Azizi F. Detection of cardiovascular risk factors by anthropometric measures in Tehranian adults: receiver operating characteristic (ROC) curve analysis. *Eur J Clin Nutr*. 2004; 58: 1110-8.
31. Taylor RW, Jones IE, Williams SM and Goulding A. Evaluation of waist circumference, waist-to-hip ratio, and the conicity index as screening tools for high trunk fat mass, as measured by dual-energy X-ray absorptiometry, in children aged 3–19 y. *American J Clin Nutr*. 2000; 72: 490-5.
32. Azizi F, Ghanbarian A, Madjid M and Rahmani M. Distribution of blood pressure and prevalence of hypertension in Tehran adult population: Tehran Lipid and Glucose Study (TLGS), 1999-2000. *J Hum Hypertens*. 2002; 16: 305-12.
33. Vasheghani-Farahani A, Tahmasbi M, Asheri H, Ashraf H, Nedjat S and Kordi R. The Persian, last 7-day, long form of the International Physical Activity Questionnaire: translation and validation study. *Asian J Sports Med*. 2011; 2: 106.
34. Zhang J, Zhao Y, Xu C, et al. Association between serum free fatty acid levels and nonalcoholic fatty liver disease: a cross-sectional study. *Sci Rep*. 2014; 4: 5832.
35. Halkes C, Van Dijk H, De Jaegere PT, et al. Postprandial increase of complement component 3 in normolipidemic patients with coronary artery disease effects of expanded-dose simvastatin. *Arterioscler Thromb Vasc Biol*. 2001; 21: 1526-30.
36. Engström G, Hedblad B, Eriksson K-F, Janzon L and Lindgärde F. Complement C3 Is a Risk Factor for the Development of Diabetes A Population-Based Cohort Study. *Diabetes*. 2005; 54: 570-5.
37. Detection EPO. EVALUATION, AND TREATMENT OF HIGH BLOOD CHOLESTEROL IN ADULTS. Executive summary of the third report of The National Cholesterol Education Program (NCEP) Expert panel on detection, evaluation, and treatment of high blood cholesterol in adults (Adult Treatment Panel III). *JAMA*. 2001; 285: 2486-97.
38. Phillips CM, Kesse-Guyot E, Ahluwalia N, et al. Dietary fat, abdominal obesity and smoking modulate the relationship between plasma complement component 3 concentrations and metabolic syndrome risk. *Atherosclerosis*. 2012; 220: 513-9.
39. Marques-Vidal P, Velho S, Waterworth D, Waeber G, von Känel R and Vollenweider P. The association between inflammatory biomarkers and metabolically healthy obesity depends of the definition used. *Eur J Clin Nutr*. 2012; 66: 426-35.
40. Phillips CM, Dillon C, Harrington JM, et al. Defining metabolically healthy obesity: role of dietary and lifestyle factors. *PLoS One*. 2013; 8: e76188.
41. Beasley LE, Koster A, Newman AB, et al. Inflammation and race and gender differences in computerized tomography-measured adipose depots. *Obesity*. 2009; 17: 1062-9.
42. Muscari A, Massarelli G, Bastagli L, et al. Relationship of serum C3 to fasting insulin, risk factors and previous ischaemic events in middle-aged men. *Eur Heart J*. 2000; 21: 1081-90.
43. Moro E, Gallina P, Pais M, Cazzolato G, Alessandrini P and Bittolo-Bon G. Hypertriglyceridemia is associated with increased insulin resistance in subjects with normal glucose tolerance: evaluation in a large cohort of subjects assessed with the 1999 World Health Organization criteria for the classification of diabetes. *Metabolism*. 2003; 52: 616-9.
44. Schmidt MI and Duncan BB. Diabetes: an inflammatory metabolic condition. *Clin Chem Lab Med*. 2003; 41: 1120-30.
45. You T and Nicklas BJ. Effects of exercise on adipokines and the metabolic syndrome. *Curr Diabetes Rep*. 2008; 8: 7-11.
46. Fantuzzi G. Adipose tissue, adipokines, and inflammation. *J Allergy Clin Immunol*. 2005; 115: 911-9.
47. Björntorp P, Bergman H and Varnauskas E. Plasma free fatty acid turnover rate in obesity. *Acta Med Scand*. 1969; 185: 351-6.
48. Jensen MD, Haymond MW, Rizza RA, Cryer PE and Miles J. Influence of body fat distribution on free fatty acid metabolism in obesity. *J Clin Invest*. 1989; 83: 1168.
49. Boden G, Cheung P, Stein TP, Kresge K and Mozzoli M. FFA cause hepatic insulin resistance by inhibiting insulin suppression of glycogenolysis. *Am J Physiol-Endocrinol Metab*. 2002; 283: E12-E9.
50. Santomauro A, Boden G, Silva M, et al. Overnight lowering of free fatty acids with Acipimox improves insulin resistance and glucose tolerance in obese diabetic and nondiabetic subjects. *Diabetes*. 1999; 48: 1836-41.



- 1  
2  
3  
4  
5  
6  
7  
8  
9  
10  
11  
12  
13  
14  
15  
16  
17  
18  
19  
20  
21  
22  
23  
24  
25  
26  
27  
28  
29  
30  
31  
32  
33  
34  
35  
36  
37  
38  
39  
40  
41  
42  
43  
44  
45  
46  
47  
48  
49  
50  
51  
52  
53  
54  
55  
56  
57  
58  
59  
60
51. Schumann RR. Old and new findings on lipopolysaccharide-binding protein: a soluble pattern-recognition molecule. *Biochem Soc Trans*. 2011; 39: 989-93.
52. Yang P-J, Lee W-J, Tseng P-H, Lee P-H, Lin M-T and Yang W-S. Bariatric surgery decreased the serum level of an endotoxin-associated marker: lipopolysaccharide-binding protein. *Surg Obes Relat Dis*. 2014; 10: 1182-7.

For peer review only

Table 1. Demographic, anthropometric, and dietary intake parameters in MUAO and MHAO patients

| Variables                            | MUAO (n=81)       | MHAO (n=83)       | OR (95% CI)        | <i>p</i>           |
|--------------------------------------|-------------------|-------------------|--------------------|--------------------|
| Age (y)†                             | 38.23 (8.52)      | 37.13 (8.64)      | 1.01 (0.97-1.05)   | 0.412 <sup>ξ</sup> |
| Men (%)                              | 50.6              | 49.4              | 1.05 (0.57-1.93)   | 0.876 <sup>£</sup> |
| Physical activity score <sup>¥</sup> | 3144 (1416, 5166) | 2412 (1260, 5211) | 1.00 (0.99, 1.00)  | 0.451 <sup>Ⓜ</sup> |
| Weight (Kg)†                         | 87.21 (13.90)     | 84.78 (13.98)     | 1.01 (0.99, 1.03)  | 0.266 <sup>ξ</sup> |
| Height (cm)†                         | 165.09 (11.56)    | 164.56 (10.60)    | 1.00 (0.97, 1.03)  | 0.762 <sup>ξ</sup> |
| Waist circumference (cm) †           | 106.02 (8.30)     | 105.06 (8.63)     | 1.01 (0.97, 1.05)  | 0.470 <sup>ξ</sup> |
| Hip circumference (cm)†              | 110.90 (6.92)     | 111.31 (8.26)     | 0.99 (0.95, 1.03)  | 0.730 <sup>ξ</sup> |
| Waist to hip ratio†                  | 0.95 (0.05)       | 0.94 (0.06)       | 2.73 (0.15, 48.00) | 0.209 <sup>ξ</sup> |
| BMI (Kg/m <sup>2</sup> )†            | 32.16 (4.25)      | 31.35 (4.12)      | 1.04 (0.97, 1.12)  | 0.214 <sup>ξ</sup> |
| Body Fat Percentage (%)†             |                   |                   |                    |                    |
| Males                                | 26.86 (5.15)      | 25.07 (4.86)      | 1.07 (0.98, 1.17)  | 0.093 <sup>ξ</sup> |
| Females                              | 38.59 (4.38)      | 39.88 (4.79)      | 0.93 (0.85, 1.03)  | 0.227 <sup>ξ</sup> |
| Body Fat Mass (kg)†                  |                   |                   |                    |                    |
| Males                                | 25.91 (7.27)      | 22.79 (6.76)      | 1.06 (1.00, 1.13)  | 0.062 <sup>ξ</sup> |
| Females                              | 31.11 (7.33)      | 32.4 (8.63)       | 0.98 (0.92, 1.03)  | 0.441 <sup>ξ</sup> |
| Body Fat Free Mass (kg)†             |                   |                   |                    |                    |
| Males                                | 69.09 (6.69)      | 66.98 (7.85)      | 1.04 (0.98, 1.10)  | 0.130 <sup>ξ</sup> |
| Females                              | 48.72 (5.08)      | 47.61 (4.94)      | 1.04 (0.95, 1.14)  | 0.425 <sup>ξ</sup> |
| Total energy intake (Kcal/day)†      | 2152.9 (765.1)    | 2206.8 (862.9)    | 1.00 (0.97-1.04)   | 0.700 <sup>ξ</sup> |
| Carbohydrate intake (% energy)†      | 60.20 (10.09)     | 59.29 (9.11)      | 1.01 (0.97-1.04)   | 0.499 <sup>ξ</sup> |
| Protein intake (% energy)†           | 14.22 (2.95)      | 14.17 (4.10)      | 1.00 (0.91-1.09)   | 0.937 <sup>ξ</sup> |
| Total fat intake (% energy)†         | 25.58 (10.54)     | 26.54 (12.14)     | 0.98 (0.95-1.02)   | 0.380 <sup>ξ</sup> |

|                                           |                      |                      |                  |                    |
|-------------------------------------------|----------------------|----------------------|------------------|--------------------|
| Total SFA intake (% energy) <sup>‡</sup>  | 14.06 (10.6, 21.87)  | 14.21 (10.18, 21.49) | 0.99 (0.96-1.02) | 0.780 <sup>Ⓜ</sup> |
| Total MUFA intake (% energy) <sup>‡</sup> | 16.39 (11.01, 24.68) | 18.26 (11.76-26.27)  | 0.99 (0.97-1.01) | 0.183 <sup>Ⓜ</sup> |
| Total PUFA intake (% energy) <sup>‡</sup> | 12.7 (9.59-22.19)    | 14.41 (8.94, 19.01)  | 1.01 (0.98-1.03) | 0.943 <sup>Ⓜ</sup> |

<sup>†</sup>Variables with normal numeric scales are reported as Mean (standard deviation).

<sup>‡</sup>Variables with non-normal numeric scales are reported as Median (25<sup>th</sup>, 75<sup>th</sup>).

<sup>§</sup>Independent Samples t-test

<sup>Ⓜ</sup>Mann-Whitney U test

<sup>£</sup>Chi Square test

MHAO, Metabolically Healthy Abdominally Obese; MUAO, Metabolically Unhealthy Abdominally Obese; OR, Odds Ratio; CI, Confidence Interval; BMI, Body Mass Index; SFA, Saturated Fatty Acids; MUFA, Mono Unsaturated fatty Acids; PUFA, Poly Unsaturated Fatty Acids.

**Table 2. Biochemical characteristics in MUAO and MHAO patients**

| Variables             | MUAO (n=81)    | MHAO (n=83)    | OR (95% CI)       | <i>p</i>            |
|-----------------------|----------------|----------------|-------------------|---------------------|
| FBS (mg/dL) ¥         | 87.72 (5.82)   | 95.50 (9.76)   | 3.79 (2.25-6.40)* | <0.001 <sup>ξ</sup> |
| TG (mg/dL) ¥          | 193 (151, 241) | 112 (88, 146)  | 1.10 (1.05-1.15)* | <0.001 <sup>Ⓜ</sup> |
| HDL-C (mg/dL) †       | 39.53 (6.65)   | 46.44 (9.20)   | 0.32 (0.20-0.52)* | <0.001 <sup>ξ</sup> |
| SBP (mg/dL) ¥         | 115 (16.45)    | 108.13 (16.60) | 1.02 (1.00-1.04)* | 0.009 <sup>ξ</sup>  |
| DBP (mg/dL) ¥         | 77.31 (13.86)  | 70.84 (12.94)  | 1.03 (1.01-1.06)* | 0.002 <sup>ξ</sup>  |
| Cholesterol (mg/dL) † | 193.60 (41.37) | 187.37 (32.91) | 1.00 (0.99, 1.01) | 0.286 <sup>ξ</sup>  |

† Variables with normal numeric scales are reported as Mean (standard deviation).

¥ Variables with non-normal numeric scales are reported as Median (25<sup>th</sup>, 75<sup>th</sup>).

<sup>ξ</sup> Independent Samples t- test

<sup>Ⓜ</sup> Mann- Whitney U test

MHAO, Metabolically Healthy Abdominally Obese; MUAO, Metabolically Unhealthy Abdominally Obese; OR, Odds Ratio; CI, Confidence Interval; FBS, Fasting Blood Sugar; TG, Triglycerides; HDL-C, High-Density Lipoprotein Cholesterol; SBP, Systolic Blood Pressure; DBP, Diastolic Blood Pressure

**Table 3.** correlation of FFAs and LBP with metabolic parameters in MUAO and MHAO individuals

| Variables | MUAO          |              | MHAO         |              |
|-----------|---------------|--------------|--------------|--------------|
|           | FFAs          | LBP          | FFAs         | LBP          |
| WC        | 0.07 (0.51)   | 0.02 (0.85)  | 0.06 (0.58)  | 0.03 (0.74)  |
| TG        | -0.02 (0.79)  | 0.008 (0.94) | -0.07 (0.48) | 0.07 (0.49)  |
| FBS       | -0.005 (0.96) | -0.18 (0.09) | 0.07 (0.50)  | 0.09 (0.40)  |
| HDL-C     | 0.01 (0.91)   | 0.08 (0.45)  | 0.10 (0.33)  | 0.41 (0.09)  |
| SBP       | -0.03 (0.78)  | -0.08 (0.46) | -0.05 (0.64) | -0.11 (0.29) |
| DBP       | -0.08 (0.43)  | -0.18 (1.00) | 0.06 (0.58)  | -0.09 (0.39) |

P=NS, using Spearman correlation coefficient test.

MHAO, Metabolically Healthy Abdominally Obese; MUAO, Metabolically Unhealthy Abdominally Obese; FBS, Fasting Blood Sugar; TG, Triglycerides; HDL-C, High-Density Lipoprotein Cholesterol; SBP, Systolic Blood Pressure; DBP, Diastolic Blood Pressure; LBP, Lipopolysaccharide Binding Protein; FFAs, Free Fatty Acids

Figure 1. Flowchart of the study

1  
2  
3  
4  
5  
6  
7  
8  
9  
10  
11  
12  
13  
14  
15  
16  
17  
18  
19  
20  
21  
22  
23  
24  
25  
26  
27  
28  
29  
30  
31  
32  
33  
34  
35  
36  
37  
38  
39  
40  
41  
42  
43  
44  
45  
46  
47  
48  
49  
50  
51  
52  
53  
54  
55  
56  
57  
58  
59  
60

For peer review only

Figure 2. Metabolic characteristics of MHAO and MUAO subjects.

p<0.001 for all except WC, using  $\chi^2$ .

MHAO, Metabolically Healthy Abdominally Obese; MUAO, Metabolically Unhealthy Abdominally Obese; FBS, Fasting Blood Sugar; TG, Triglycerides; HDL-C, High-Density Lipoprotein Cholesterol; Htn, Hypertension.

For peer review only

Figure 3. Lipopolysaccharide binding protein (LBP) ( $\mu\text{g/mL}$ ) (a) and free fatty acids (FFAs) concentrations (nmol/L) (b) in subjects with MHAO (Controls) and MUAO (Cases).

$p=\text{NS}$

Data are presented as box plot where boxes represent the interquartile range [IQR], the line within boxes represent the median, and the lines outside the boxes represent the lower quartile minus 1.5 times the IQR or the upper quartile plus 1.5 times the IQR.

For peer review only



1 Figure 4. Spearman correlation between LBP and FFAs in pooled population (Fig. 4-a) as well as in each  
2 study group (Fig. 4-b).  
3  
4  
5  
6  
7  
8  
9  
10  
11  
12  
13  
14  
15  
16  
17  
18  
19  
20  
21  
22  
23  
24  
25  
26  
27  
28  
29  
30  
31  
32  
33  
34  
35  
36  
37  
38  
39  
40  
41  
42  
43  
44  
45  
46  
47  
48  
49  
50  
51  
52  
53  
54  
55  
56  
57  
58  
59  
60

For peer review only

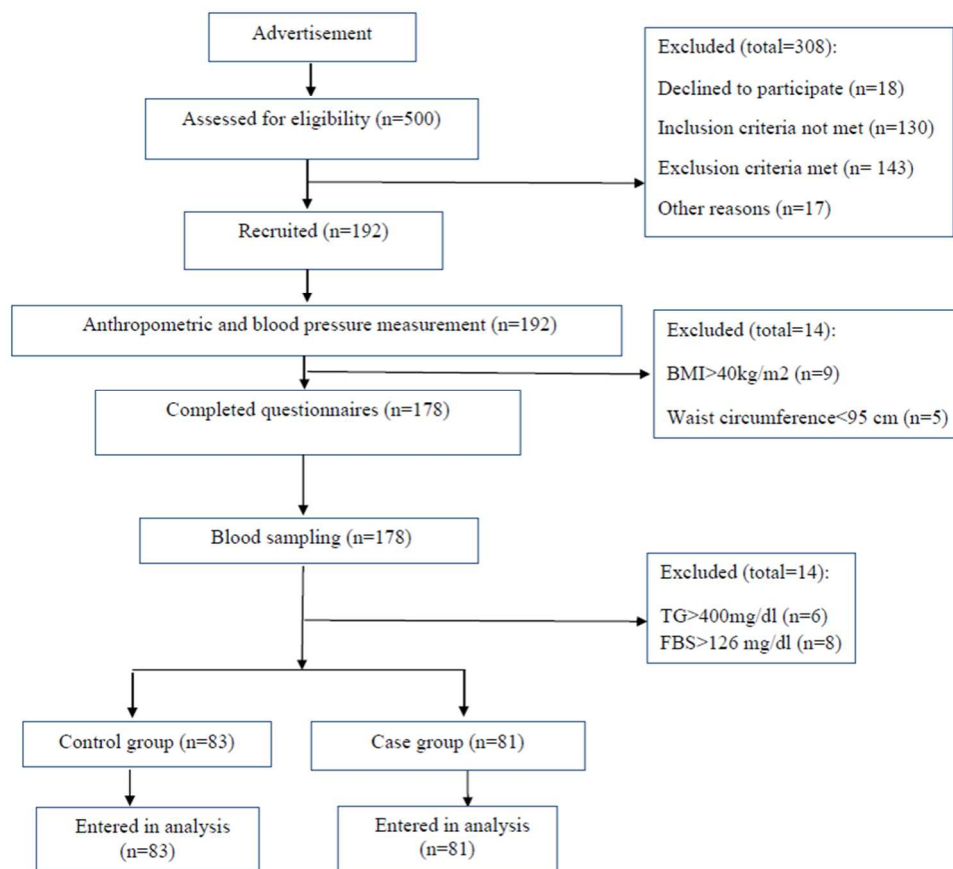

Figure 1. Flowchart of the study

76x67mm (300 x 300 DPI)

only

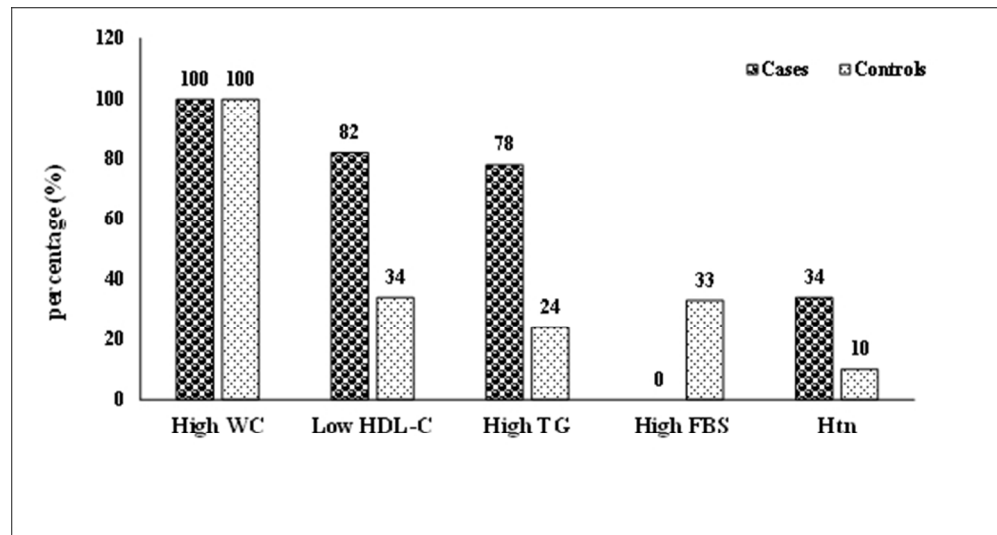

Figure 2. Metabolic characteristics of MHAO and MUAO subjects. † † P<0.001 for all except WC, using X2. † † † MHAO, Metabolically Healthy Abdominally Obese; MUAO, Metabolically Unhealthy Abdominally Obese; FBS, Fasting Blood Sugar; TG, Triglycerides; HDL-C, High-Density Lipoprotein Cholesterol; Htn, Hypertension. † † †

51x27mm (300 x 300 DPI)

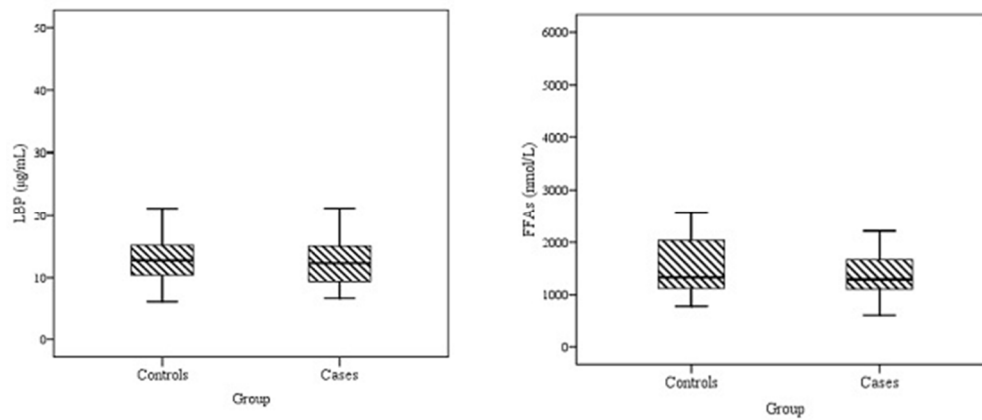

Figure 3. Lipopolysaccharide binding protein (LBP) ( $\mu\text{g/mL}$ ) (a) and free fatty acids (FFAs) concentrations ( $\text{nmol/L}$ ) (b) in subjects with MHAO (Controls) and MUAO (Cases).  $\dagger \dagger P=\text{NS} \dagger \dagger$  Data are presented as box plot where boxes represent the interquartile range [IQR], the line within boxes represent the median, and the lines outside the boxes represent the lower quartile minus 1.5 times the IQR or the upper quartile plus 1.5 times the IQR.  $\dagger \dagger \dagger \dagger$

52x22mm (300 x 300 DPI)

review only

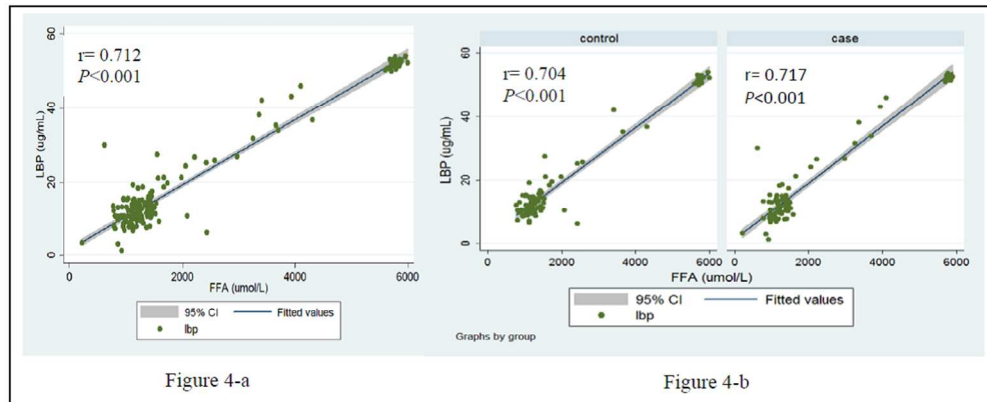

Figure 4. Spearman correlation between LBP and FFAs in pooled population (Fig. 4-a) as well as in each study group (Fig. 4-b).

96x39mm (300 x 300 DPI)

STROBE 2007 (v4) Statement—Checklist of items that should be included in reports of *case-control studies*

| Section/Topic             | Item # | Recommendation                                                                                                                                                                       | Reported on page # |
|---------------------------|--------|--------------------------------------------------------------------------------------------------------------------------------------------------------------------------------------|--------------------|
| Title and abstract        | 1      | (a) Indicate the study’s design with a commonly used term in the title or the abstract                                                                                               | 2                  |
|                           |        | (b) Provide in the abstract an informative and balanced summary of what was done and what was found                                                                                  | 2, 3               |
| <b>Introduction</b>       |        |                                                                                                                                                                                      |                    |
| Background/rationale      | 2      | Explain the scientific background and rationale for the investigation being reported                                                                                                 | 4, 5               |
| Objectives                | 3      | State specific objectives, including any prespecified hypotheses                                                                                                                     | 5                  |
| <b>Methods</b>            |        |                                                                                                                                                                                      |                    |
| Study design              | 4      | Present key elements of study design early in the paper                                                                                                                              | 5                  |
| Setting                   | 5      | Describe the setting, locations, and relevant dates, including periods of recruitment, exposure, follow-up, and data collection                                                      | 5                  |
| Participants              | 6      | (a) Give the eligibility criteria, and the sources and methods of case ascertainment and control selection. Give the rationale for the choice of cases and controls                  | 5, 6               |
|                           |        | (b) For matched studies, give matching criteria and the number of controls per case                                                                                                  | 5                  |
| Variables                 | 7      | Clearly define all outcomes, exposures, predictors, potential confounders, and effect modifiers. Give diagnostic criteria, if applicable                                             | 6                  |
| Data sources/ measurement | 8*     | For each variable of interest, give sources of data and details of methods of assessment (measurement). Describe comparability of assessment methods if there is more than one group | 6,7                |
| Bias                      | 9      | Describe any efforts to address potential sources of bias                                                                                                                            | 3                  |
| Study size                | 10     | Explain how the study size was arrived at                                                                                                                                            | 8                  |
| Quantitative variables    | 11     | Explain how quantitative variables were handled in the analyses. If applicable, describe which groupings were chosen and why                                                         | 8                  |
| Statistical methods       | 12     | (a) Describe all statistical methods, including those used to control for confounding                                                                                                | 8                  |
|                           |        | (b) Describe any methods used to examine subgroups and interactions                                                                                                                  | Not applicable     |
|                           |        | (c) Explain how missing data were addressed                                                                                                                                          | Not applicable     |
|                           |        | (d) If applicable, explain how matching of cases and controls was addressed                                                                                                          | 5                  |
|                           |        | (e) Describe any sensitivity analyses                                                                                                                                                | Not applicable     |
| <b>Results</b>            |        |                                                                                                                                                                                      |                    |

1  
2  
3  
4  
5  
6  
7  
8  
9  
10  
11  
12  
13  
14  
15  
16  
17  
18  
19  
20  
21  
22  
23  
24  
25  
26  
27  
28  
29  
30  
31  
32  
33  
34  
35  
36  
37  
38  
39  
40  
41  
42  
43  
44  
45  
46  
47  
48  
49

|                          |     |                                                                                                                                                                                                              |                |
|--------------------------|-----|--------------------------------------------------------------------------------------------------------------------------------------------------------------------------------------------------------------|----------------|
| Participants             | 13* | (a) Report numbers of individuals at each stage of study—eg numbers potentially eligible, examined for eligibility, confirmed eligible, included in the study, completing follow-up, and analysed            | 6              |
|                          |     | (b) Give reasons for non-participation at each stage                                                                                                                                                         | 6              |
|                          |     | (c) Consider use of a flow diagram                                                                                                                                                                           | Figure 1       |
| Descriptive data         | 14* | (a) Give characteristics of study participants (eg demographic, clinical, social) and information on exposures and potential confounders                                                                     | Table 1        |
|                          |     | (b) Indicate number of participants with missing data for each variable of interest                                                                                                                          | Table 1        |
| Outcome data             | 15* | Report numbers in each exposure category, or summary measures of exposure                                                                                                                                    | Table 1,2      |
| Main results             | 16  | (a) Give unadjusted estimates and, if applicable, confounder-adjusted estimates and their precision (eg, 95% confidence interval). Make clear which confounders were adjusted for and why they were included | Table 1, 2     |
|                          |     | (b) Report category boundaries when continuous variables were categorized                                                                                                                                    | 6              |
|                          |     | (c) If relevant, consider translating estimates of relative risk into absolute risk for a meaningful time period                                                                                             | Not applicable |
| Other analyses           | 17  | Report other analyses done—eg analyses of subgroups and interactions, and sensitivity analyses                                                                                                               | Not applicable |
| <b>Discussion</b>        |     |                                                                                                                                                                                                              |                |
| Key results              | 18  | Summarise key results with reference to study objectives                                                                                                                                                     | 9              |
| Limitations              | 19  | Discuss limitations of the study, taking into account sources of potential bias or imprecision. Discuss both direction and magnitude of any potential bias                                                   | 3              |
| Interpretation           | 20  | Give a cautious overall interpretation of results considering objectives, limitations, multiplicity of analyses, results from similar studies, and other relevant evidence                                   | 10-12          |
| Generalisability         | 21  | Discuss the generalisability (external validity) of the study results                                                                                                                                        | 3, 12          |
| <b>Other information</b> |     |                                                                                                                                                                                                              |                |
| Funding                  | 22  | Give the source of funding and the role of the funders for the present study and, if applicable, for the original study on which the present article is based                                                | 13             |

\*Give information separately for cases and controls in case-control studies and, if applicable, for exposed and unexposed groups in cohort and cross-sectional studies.

**Note:** An Explanation and Elaboration article discusses each checklist item and gives methodological background and published examples of transparent reporting. The STROBE checklist is best used in conjunction with this article (freely available on the Web sites of PLoS Medicine at <http://www.plosmedicine.org/>, Annals of Internal Medicine at <http://www.annals.org/>, and Epidemiology at <http://www.epidem.com/>). Information on the STROBE Initiative is available at [www.strobe-statement.org](http://www.strobe-statement.org).

# BMJ Open

## Association of endotoxemia with serum free fatty acids in metabolically healthy and unhealthy abdominally obese individuals: a case-control study in northwest of Iran

|                                 |                                                                                                                                                                                                                                                                                                                                                                                                                                                                                                                                                                                                                                                                                                                                                                                                                                                                                                                                                                 |
|---------------------------------|-----------------------------------------------------------------------------------------------------------------------------------------------------------------------------------------------------------------------------------------------------------------------------------------------------------------------------------------------------------------------------------------------------------------------------------------------------------------------------------------------------------------------------------------------------------------------------------------------------------------------------------------------------------------------------------------------------------------------------------------------------------------------------------------------------------------------------------------------------------------------------------------------------------------------------------------------------------------|
| Journal:                        | <i>BMJ Open</i>                                                                                                                                                                                                                                                                                                                                                                                                                                                                                                                                                                                                                                                                                                                                                                                                                                                                                                                                                 |
| Manuscript ID                   | bmjopen-2017-015910.R2                                                                                                                                                                                                                                                                                                                                                                                                                                                                                                                                                                                                                                                                                                                                                                                                                                                                                                                                          |
| Article Type:                   | Research                                                                                                                                                                                                                                                                                                                                                                                                                                                                                                                                                                                                                                                                                                                                                                                                                                                                                                                                                        |
| Date Submitted by the Author:   | 24-Mar-2017                                                                                                                                                                                                                                                                                                                                                                                                                                                                                                                                                                                                                                                                                                                                                                                                                                                                                                                                                     |
| Complete List of Authors:       | Saghafi-Asl, Maryam; Tabriz University of Medical Sciences, Nutrition Research Center, Department of Biochemistry and Diet Therapy, School of Nutrition and Food Sciences, Tabriz University of Medical Sciences, Tabriz, Iran<br>Amiri, Parichehr; Tabriz University of Medical Sciences, Student Research Committee, School of Nutrition and Food Sciences, Tabriz University of Medical Sciences, Tabriz, Iran<br>Naghizadeh, Mahsa; Tabriz University of Medical Sciences, Student Research Committee, School of Nutrition and Food Sciences, Tabriz University of Medical Sciences, Tabriz, Iran<br>Ghavami, Seyed Mostafa; Tabriz University of Medical Sciences, Department of Radiology, School of Paramedicine, Tabriz University of Medical Sciences, Tabriz, Iran<br>Karamzad, Nahid; Maragheh University of Medical Sciences, Department of Public Health, School of Nursing and Midwifery, Maragheh University of Medical Sciences, Maragheh, Iran |
| <b>Primary Subject Heading</b>: | Nutrition and metabolism                                                                                                                                                                                                                                                                                                                                                                                                                                                                                                                                                                                                                                                                                                                                                                                                                                                                                                                                        |
| Secondary Subject Heading:      | Nutrition and metabolism, Public health                                                                                                                                                                                                                                                                                                                                                                                                                                                                                                                                                                                                                                                                                                                                                                                                                                                                                                                         |
| Keywords:                       | PUBLIC HEALTH, NUTRITION & DIETETICS, Diabetes & endocrinology < INTERNAL MEDICINE                                                                                                                                                                                                                                                                                                                                                                                                                                                                                                                                                                                                                                                                                                                                                                                                                                                                              |
|                                 |                                                                                                                                                                                                                                                                                                                                                                                                                                                                                                                                                                                                                                                                                                                                                                                                                                                                                                                                                                 |

SCHOLARONE™  
Manuscripts



1  
2  
3  
4  
5  
6  
7  
8  
9  
10  
11  
12  
13  
14  
15  
16  
17  
18  
19  
20  
21  
22  
23  
24  
25  
26  
27  
28  
29  
30  
31  
32  
33  
34  
35  
36  
37  
38  
39  
40  
41  
42  
43  
44  
45  
46  
47  
48  
49  
50  
51  
52  
53  
54  
55  
56  
57  
58  
59  
60

## Association of endotoxemia with serum free fatty acids in metabolically healthy and unhealthy abdominally obese individuals: a case-control study in northwest of Iran

Maryam Saghafi-Asl<sup>1</sup>, Parichehr Amiri<sup>2</sup>, Mahsa Naghizadeh<sup>2</sup>, Seyed Mostafa Ghavami<sup>3</sup>, Nahid Karamzad<sup>4,\*</sup>

<sup>1</sup> Nutrition Research Center, Department of Biochemistry and Diet Therapy, School of Nutrition and Food Sciences, Tabriz University of Medical Sciences, Tabriz, Iran

<sup>2</sup> Student Research Committee, School of Nutrition and Food Sciences, Tabriz University of Medical Sciences, Tabriz, Iran

<sup>3</sup> Department of Radiology, School of Paramedicine, Tabriz University of Medical Sciences, Tabriz, Iran

<sup>4</sup> Department of Public Health, School of Nursing and Midwifery, Maragheh University of Medical Sciences, Maragheh, Iran

**Running Title:** Association of endotoxemia with serum free fatty acids

**\*Corresponding Author:** Nahid Karamzad, Department of Public Health, School of Nursing and Midwifery, Maragheh University of Medical Sciences, Maragheh, Iran.

**E-mail address:** nahidkaramzad@gmail.com

## Association of endotoxemia with serum free fatty acids in metabolically healthy and unhealthy abdominally obese individuals: a case-control study in northwest of Iran

### Abstract

**Objectives:** This study was aimed to compare serum free fatty acids (FFAs) and lipopolysaccharide binding protein (LBP) between metabolically healthy abdominally obese (MHAO) and metabolically unhealthy abdominally obese (MUAO) individuals. We also examined the association between serum FFAs and LBP in the participants.

**Methods:** In this age- and gender-matched case-control study, 164 abdominally obese subjects were recruited from June to November, 2015 in the Northwest of Iran. Demographic data, dietary intake, body composition, anthropometric indices, and physical activity were assessed. Basal blood samples were collected to determine serum metabolic parameters, FFAs, and LBP. Abdominal obesity was defined as having waist circumference (WC)  $\geq$  95cm. Those with 3 or more metabolic alterations were defined as MUAO and those having 2 or less were classified as MHAO. Data were analyzed using SPSS ver. 17.0.

**Results:** There were no significant differences in dietary intake, anthropometric indices, body composition, and physical activity between the two groups. The odds of MUAO significantly increased by increments in serum fasting blood sugar (OR= 3.79, 95 % CI: 2.25-6.40), TG (OR= 1.10, 95 % CI: 1.05-1.15), systolic blood pressure (OR= 1.02, 95 % CI: 1.00-1.04), and diastolic blood pressure (OR= 1.03, 95 % CI: 1.01-1.06) and decreased by increase in serum high-density lipoprotein- cholesterol (OR= 0.32, 95 % CI: 0.20-0.52). The levels of LBP and FFAs showed no significant differences between the two groups. However, significant correlations were found between LBP and FFAs in pooled population ( $r=0.712$ ;  $P<0.001$ ) as well as in cases ( $r=0.717$ ;  $P<0.001$ ) and controls ( $r=0.704$ ;  $P<0.001$ ). Neither FFAs nor LBP were significantly correlated with dietary intake or metabolic parameters ( $p>0.05$ ).

**Conclusion:** The results indicated that serum LBP and FFAs are highly correlated both in MHAO and MUAO states. In addition, the levels of LBP and FFAs seem to be more related to abdominal obesity than to the presence or absence of metabolic health.

**Key words:** free fatty acids; lipopolysaccharide binding protein; metabolic health; abdominal obesity

### **Strengths and limitations of this study**

- 1) The association of LBP and FFAs levels in MHAO and MUAO individuals for the first time and found significant differences between the two parameters.
- 2) This was a case-control study in which causality could not be assessed.
- 3) Insulin levels were not measured in our study population; therefore, insulin resistance was not studied.
- 4) The present work was carried out on volunteer participants. Though all volunteers were randomly recruited from general population after public announcement and based on the eligible criteria.

## Introduction

1  
2  
3 Obesity is increasingly prevalent worldwide<sup>1</sup>. There are well-established health consequences of obesity  
4 such as type 2 diabetes, metabolic syndrome (MetS), and cardiovascular disease<sup>2</sup>. However, not all obese  
5 people are at higher risk of metabolic diseases. In a subtype of obese persons, described as “metabolically  
6 healthy obese (MHO)”, the obese phenotype may exist devoid of metabolic dysfunction<sup>3</sup>. Despite there is  
7 still no uniform definition for MHO, it is thought to account for approximately one fifth of the obese  
8 population<sup>4</sup>.

9  
10  
11  
12  
13  
14  
15  
16  
17  
18 Evidence increasingly identifies inflammation as a potential mechanism linking adiposity especially  
19 abdominal fat and metabolic dysfunction<sup>5</sup>. However, published results are rare and conflicting regarding  
20 the role of inflammation in the metabolic differences observed between metabolically healthy and  
21 unhealthy individuals<sup>6-7</sup>. Studies on postmenopausal obese women suggest that the MHO may have more  
22 favorable inflammatory profiles<sup>8</sup> and less visceral fat<sup>9</sup> than their counterparts with insulin resistance (IR)  
23 and other metabolic abnormalities<sup>10</sup>. In contrast, another study<sup>11</sup> reported that MHO women displayed  
24 abnormal levels of inflammatory profile, despite not having increased 10-year risk of cardiovascular  
25 disease.

26  
27  
28  
29  
30  
31  
32  
33  
34  
35  
36  
37 Basic mechanism accounted for inflammation in adipose tissue is still unknown, but some factors including  
38 plasma free fatty acids (FFAs) are suggested<sup>12</sup>. It was clarified that plasma FFAs are increased among the  
39 obese as they are released from inflamed adipose tissue<sup>13</sup> and through the lipolysis of adipocytes<sup>14</sup>.  
40  
41  
42 However, little is known about the contribution of FFAs to the development of inflammation in obesity.  
43  
44  
45 Therefore, examining the association of FFAs with inflammatory markers seems to be warranted.

46  
47  
48  
49  
50 Lipopolysaccharide (LPS) molecules, also known as bacterial endotoxins, may trigger inflammation, leading  
51 to activation of immunity and cytokine release. LPS infusion and consequent subclinical endotoxemia  
52 results in elevated levels of proinflammatory markers and metabolic aberrations<sup>15-16</sup>. LPS has a short half-  
53 life<sup>17</sup> and there is no agreement on the measurement of its plasma level<sup>18</sup>. Hence, lipopolysaccharide-

1 binding protein (LBP) is introduced with longer half-life and more reliable measurement <sup>19-20</sup>. Also, serum  
2 LBP level is a proxy of serum LPS level <sup>21</sup>. A population-based study <sup>22</sup> found that LBP was significantly  
3 associated with MetS in normal-weight participants. Another study <sup>23</sup> reported that among MetS  
4 components, LBP concentration was independently associated with abdominal obesity.  
5  
6  
7  
8

9  
10 In prior studies, inflammatory parameters were compared between obese and lean subjects <sup>19, 24-25</sup>.  
11 Therefore, it remains unclear whether the observed alterations in serum FFAs and/or inflammatory  
12 parameters in metabolically unhealthy obese patients are due to adiposity and/or metabolic state.  
13 Therefore, regarding the significant confounding effect of abdominal obesity, we used waist circumference  
14 (WC), as a reflection of visceral adipose tissue <sup>26</sup>, to define abdominal obesity, and examined differences in  
15 characteristics and inflammatory markers (serum LBP and FFAs) between “metabolically healthy” and  
16 “unhealthy” abdominally obese individuals. We also examined the association between serum FFAs and  
17 LBP in pooled population as well as in each group.  
18  
19  
20  
21  
22  
23  
24  
25  
26  
27  
28  
29

## 30 **Methods**

### 31 **Study design and participants**

32  
33 A total of 81 metabolically healthy abdominally obese (MHAO) with 83 age- and gender-matched  
34 metabolically unhealthy abdominally obese (MUHAO) were recruited in this case-control study, carried out  
35 from June 15<sup>th</sup> to November 6<sup>th</sup>, 2015 in the Northwest of Iran. Frequency matching was carried out for the  
36 present study. Apparently healthy individuals aged 18-60 years with abdominal obesity were included in  
37 the study. We excluded pregnant or lactating women, those with diarrhea for 3 consecutive days within  
38 the previous 3 months, diagnosed diabetes, coronary heart disease, stroke, myocardial infarction,  
39 cardiovascular and kidney, liver or infectious diseases including tuberculosis, AIDS, and hepatitis; thyroid  
40 problems, severe mental disorders or physical disabilities and malignancies; taking oral antidiabetic agents  
41 or insulin or other drugs for the last 2 months, or antibiotics used for 3 consecutive days within the  
42  
43  
44  
45  
46  
47  
48  
49  
50  
51  
52  
53  
54  
55  
56  
57  
58  
59  
60

1  
2  
3  
4  
5  
6  
7  
8  
9  
10  
11  
12  
13  
14  
15  
16  
17  
18  
19  
20  
21  
22  
23  
24  
25  
26  
27  
28  
29  
30  
31  
32  
33  
34  
35  
36  
37  
38  
39  
40  
41  
42  
43  
44  
45  
46  
47  
48  
49  
50  
51  
52  
53  
54  
55  
56  
57  
58  
59  
60

previous 3 months; smokers or alcohol consumers; misreported dietary intakes (less than 800 kcal/d or more than 4200 kcal/d), or being on specific diets in the past 6 months; and having gastrointestinal surgery within past 1 year.

Abdominal obesity was defined as having waist circumference (WC)  $\geq 95$  cm according to the Iranian National Committee of Obesity <sup>27</sup>. According to Meigs *et al.* <sup>28</sup>, metabolic health was defined as the presence of  $< 3$  of the following metabolic abnormalities including abdominal obesity (WC  $\geq 95$  cm for both genders) <sup>27</sup>; high serum triglyceride (TG) concentration ( $\geq 150$  mg/dL); low serum high density lipoprotein cholesterol (HDL-C) ( $< 40$  mg/dL for men and  $< 50$  mg/dL for women); elevated blood pressure (BP) ( $\geq 130/85$  mmHg); and fasting blood sugar (FBS) ( $\geq 100$  mg/dL). Eighty-one individuals with  $\geq 3$  criteria entered the case group (MUAO) and 83 with 2 or less criteria formed the control group (MHAO).

### Sampling procedures

After public announcement for the study, 500 volunteers were recruited from general population. Of these, 178 people could enter the study based on the defined eligibility criteria for the present study. Informed consent was taken from each participant before the study. After taking blood samples and anthropometric measurements, 14 of them were excluded due to diabetes (FBS  $\geq 126$  mg/dl <sup>29</sup> in two occasions), leaving 164 people (82 men, 82 women) to conduct the research.

### Biochemical assays

After a 12-h overnight fast, 5cc blood were obtained for serum analyses. After centrifugation at 3000 rpm for 5 min, metabolic parameters were analyzed immediately, but serum FFAs and LBP were analyzed after supplying in  $-80^{\circ}\text{C}$ .

FBS was measured by the enzymatic colorimetric method using glucose oxidase. Serum TG concentration was measured by commercially available enzymatic reagents with glycerol phosphate oxidase. Serum HDL-C was measured after precipitation of the apolipoprotein B containing lipoproteins with phosphotungstic

1 acid. Assays were performed using Pars Azmoon kits (Pars Azmoon Inc., Tehran, Iran) and a Selectra 2 auto-  
2 analyzer (Vital Scientific, Spankeren, Netherlands). Inter- and intra- assay coefficient of variation (CV)  
3 was < 5% for all assays. Serum samples for both LBP and FFAs assays were stored at -80°C until analysis.  
4  
5 Both serum LBP and FFAs levels were determined by a sandwich ELISA (Bioassay Technology Laboratory,  
6  
7 Shanghai Korean Biotech Co., LTD; Shanghai City, China) according to the manufacturer's instructions. The  
8  
9 intra-assay and inter-assay coefficients of variation were <8 and <10%, respectively.  
10  
11  
12  
13

## 14 **Measurements**

15  
16  
17 All anthropometric indices were measured by a trained researcher. Height (without shoes in standard  
18 situation with precision of 0.1 cm and with an inelastic measuring tape) and weight (with Seca scale, light  
19 clothes and precision of 0.1 kg) were measured and BMI was calculated as weight in kg divided by the  
20 square of height in meters<sup>30</sup>. WC was measured using a non-stretchable fiber measuring tape. The subjects  
21  
22 were asked to stand erect in relaxed position with both feet together on flat surface. WC was measured as  
23  
24 the smallest horizontal girth between the costal and iliac crests at minimal respiration. Hip circumference  
25  
26 was taken as the greatest circumference at the level of greater trochanters (the widest portion of the hip)  
27  
28 on both sides. Waist to hip ratio (WHR) was calculated by dividing WC (cm) by hip circumference (cm)<sup>31</sup>.  
29  
30 BP was recorded in a comfortable sitting position in the left arm after at least a 5-min rest, using the  
31  
32 mercury sphygmomanometer. Two measurements were taken and the mean of the two measurements  
33  
34 was considered as the BP<sup>32</sup>. Bioelectrical Impedance Analysis (BIA: BC-418MA, Tanita, Japan) was used to  
35  
36 describe fat percent, fat Mass (FM), and fat free mass (FFM). Dietary intake was assessed using a 3-day  
37  
38 food record (one weekend day and two workdays). *Nutritionist IV* software (Axxya Systems, Stafford, TX),  
39  
40 modified for Iranian foods, were used for dietary data analysis. Physical activity (PA) was measured via  
41  
42 IPAQ-long form questionnaire<sup>33</sup>.  
43  
44  
45  
46  
47  
48  
49  
50  
51  
52

## 53 **Statistical analysis and sample size**

1 To examine the normal distribution of variables, Kolmogorov-Smirnov tests and histograms were applied.  
2  
3 The independent samples t-test was used to compare the means (standard deviation: SD) of normally  
4 distributed variables between the two groups. The Mann-Whitney U test was used for values with skewed  
5 distribution and in such conditions, median (25<sup>th</sup>, 75<sup>th</sup>) was reported. In order to assess the association of  
6 two categorical variables, Chi-square test was applied. The correlation between serum FFAs and LBP was  
7 assessed using Spearman correlation coefficient analysis. Odds ratios and their 95% confidence intervals  
8 (CI) were reported using Logistic Regression test.  
9  
10

11  
12 The larger sample size was calculated for serum FFAs compared to LBP, using literature-derived data<sup>34</sup> for  
13 nonalcoholic fatty liver disease (NAFLD) patients; the effect size for serum FFAs was 0.20 nmol/l (SD<sub>1</sub>=0.34  
14 nmol/l for controls and SD<sub>2</sub>=0.53 nmol/l for NAFLD patients). Therefore, sample size estimation was based  
15 upon this parameter with 80% power and  $\alpha$ -error of 5% and a case to control ratio of 1:1. It was predicted  
16 that 79 persons in each group would detect changes in serum FFAs as well as serum LBP level, using the  
17 two-means formula. Data were analyzed using SPSS ver. 17.0 for Windows (PASW Statistics; SPSS Inc.,  
18 Chicago, IL, USA). P-value less than 0.05 was considered significant.  
19  
20  
21  
22  
23  
24  
25  
26  
27  
28  
29  
30  
31  
32

## 33 Results

34  
35 Males comprised about 50% of the study participants in the two groups ( $p=0.87$ ). The age range of the  
36 subjects was 20-59 years. Participants of the two study groups similarly had WC $\geq$ 95 cm i.e. the cut-off  
37 point of WC for Iranian population. Overall, there were no significant differences in age, gender,  
38 anthropometric indices, and body composition between the two groups. Dietary parameters especially  
39 total fat, saturated fatty acids (SFA), monounsaturated fatty acids (MUFA), polyunsaturated fatty acids  
40 (PUFA) intakes were more or less the same between the two study groups (Table 1). Marital status,  
41 education level, and job of the cases and controls were also similar. However, mean number of metabolic  
42 aberrations were significantly higher in cases than controls ( $3.25\pm 0.72$  vs.  $1.67\pm 0.50$ ;  $P<0.001$ ) (data not  
43 shown). The flow chart of the study is shown in Figure 1.  
44  
45  
46  
47  
48  
49  
50  
51  
52  
53  
54  
55  
56  
57  
58  
59  
60



1 Except for WC which was matched between the two groups, metabolic aberrations including low HDL-C  
2 (82% vs. 34%), high TG (78% vs. 24%), high FBS (33% vs. 0%), and hypertension (34% vs. 10%) were  
3 significantly higher in the cases than controls, respectively (Figure 2). The current study indicated that each  
4 10 unit increment in serum FBS level increased the risk of MUAO about 3.8 times (OR= 3.79, 95 % CI: 2.25-  
5 6.40). Additionally, the odds of MUAO was significantly increased per one increment in serum TG level  
6 (OR= 1.10, 95 % CI: 1.05-1.15), the systolic BP (OR= 1.02, 95 % CI: 1.00-1.04), and diastolic BP (OR= 1.03, 95  
7 % CI: 1.01-1.06). However, the odds of having MUAO was significantly decreased by 68% per 10 unit  
8 increment in serum HDL-C level (OR= 0.32, 95 % CI: 0.20-0.52) (Table 2).

9  
10  
11  
12  
13  
14  
15  
16  
17  
18  
19  
20 The median of LBP (12.32  $\mu\text{g}/\text{mL}$  in cases vs. 12.76  $\mu\text{g}/\text{mL}$  in controls,  $P=0.483$ ) and FFAs (1294 nmol/L in  
21 cases vs. 1333 nmol/L in controls;  $P=0.686$ ) showed no significant difference between the two groups  
22 (Figure 3). However, a significant correlation was found between LBP and FFAs in pooled population  
23 (Figure 3). However, a significant correlation was found between LBP and FFAs in pooled population  
24 ( $r=0.712$ ;  $P<0.001$ ) as well as in cases ( $r=0.717$ ;  $P<0.001$ ) and controls ( $r=0.704$ ;  $P<0.001$ ) (Figure 4). The  
25 results of partial correlation indicated much stronger correlation between LBP and FFAs, when controlling  
26 for WC ( $r=0.961$ ;  $P<0.001$ ). Moreover, number of metabolic aberrations were significantly correlated with  
27 HDL-C ( $r=-0.537$ ;  $P<0.001$ ), TG ( $r=0.468$ ;  $P<0.001$ ), FBS ( $r=0.534$ ;  $P<0.001$ ), Systolic BP ( $r=0.247$ ;  $P=0.001$ ),  
28 and Diastolic BP ( $r=0.315$ ;  $P<0.001$ ). Neither FFAs nor LBP were significantly correlated with dietary intake  
29 of total fat, SFA, MUFA, and PUFA (data not shown). There were also no significant correlations of LBP and  
30 FFAs with metabolic parameters (Table 3).

## 31 Discussion

32  
33  
34  
35  
36  
37  
38  
39  
40  
41  
42  
43  
44  
45  
46  
47 The present study, to the best of our knowledge, examined the association of LBP and FFAs levels in MHAO  
48 and MUAO individuals for the first time and found significant differences between the two parameters.  
49 Anthropometric indices as well as body composition profile were similar between the two groups.  
50 Moreover, there were no significant differences in LBP and FFAs between MHAO and MUAO.  
51  
52  
53  
54  
55  
56  
57  
58  
59  
60

1  
2  
3  
4  
5  
6  
7  
8  
9  
10  
11  
12  
13  
14  
15  
16  
17  
18  
19  
20  
21  
22  
23  
24  
25  
26  
27  
28  
29  
30  
31  
32  
33  
34  
35  
36  
37  
38  
39  
40  
41  
42  
43  
44  
45  
46  
47  
48  
49  
50  
51  
52  
53  
54  
55  
56  
57  
58  
59  
60

In the present study, we matched metabolically healthy with metabolically unhealthy individuals on abdominal fat which might explain why we did not find any differences in levels of FFAs and LBP, as inflammatory markers, and body composition between the two groups. Therefore, the levels of LBP and FFAs seem to be more related to abdominal obesity than to the presence or absence of metabolic health. This is further supported by the observation that serum FFAs or LBP levels were not correlated with metabolic parameters. Therefore, our findings suggest that increased levels of these two markers are not necessarily related to the presence of metabolic aberrations.

A few smaller studies have examined differences in body composition and/or inflammatory profile between metabolically healthy and unhealthy obese postmenopausal women<sup>35-37</sup>. In line with our result, Engström *et al.*<sup>36</sup> in a research on 58 obese postmenopausal women found no significant differences in levels of inflammatory markers between those with metabolic syndrome (MetS) compared to those without MetS. Additionally, in the population-based study of Philips *et al.*<sup>38</sup>, no significant difference was noted in CRP level between MHAO and MUAO, based on metabolic health criteria of Meigs *et al.*<sup>28</sup> study. It is noteworthy that in the present study we used Meigs's metabolic health definition in which WC has also been considered.

A recent study revealed that the association between inflammatory biomarkers and metabolically healthy obesity depends on the criteria used. Since in that research, a significant difference was noted in the levels of CRP and IL-6 with some but not all MHAO definitions, which disappeared after adjustment for abdominal obesity or percent body fat<sup>39</sup>. This study confirms our results. However, Phillips *et al.*<sup>40</sup> showed that obese women and men with MetS had significantly higher levels of inflammatory cytokines than obese persons without MetS. Beasley *et al.*<sup>41</sup> showed that visceral adiposity, and not abdominal subcutaneous fat, was most consistently associated with significantly higher levels of IL-6 and CRP levels in black and white men and women in the Health ABC study. We could not measure visceral fat in our study, though, abdominal obesity measured through WC, can reflect visceral adiposity<sup>26</sup>. On the other hand, a recent

1 work observed no significant differences in visceral fat between the obese-insulin resistant and obese-  
2 insulin sensitive persons <sup>42</sup>.  
3

4 Several studies have demonstrated a strong association of IR with obesity, low HDL-C,  
5 hypertriglyceridemia, and hypertension <sup>10, 43</sup> as well as inflammatory factors <sup>44</sup>. However, in our study, we  
6 could not assess IR, due to some financial deficits.  
7  
8  
9  
10

11 In the present work, dietary intake was compared between the two obese groups; therefore, no significant  
12 difference was found in terms of energy or macronutrients especially fat intake. Moreover, habitual  
13 physical activity (PA) was controlled between the study groups. And, in our previous report, there were no  
14 significant differences between the two groups in terms of PA (unpublished data). Since different levels of  
15 habitual PA might affect levels of serum inflammatory markers <sup>45</sup>.  
16  
17  
18  
19  
20  
21  
22  
23  
24

25 Obesity, as a well-known metabolic risk factor, is usually associated with mild chronic inflammation <sup>46</sup>. The  
26 relationship between obesity and increased inflammation may be justified, in part, by FFAs <sup>47</sup> which are  
27 released from adipocytes through lipolysis and are elevated in obesity due to increased adipose tissue <sup>48</sup>.  
28 Inflammatory cytokines such as interleukin-6 (IL-6) can stimulate lipolysis and increase levels of FFAs <sup>49</sup>. On  
29 the other hand, in healthy persons an acute increase in FFAs can induce inflammatory changes <sup>50</sup>.  
30 Therefore, FFAs are not only increased by inflammation, but also promote inflammation. The results of the  
31 present research showed that FFAs are positively correlated with LBP levels either in the pooled population  
32 or in each group. It shows that any increase in the level of FFAs, observed in the abdominally obese,  
33 regardless of their metabolic aberrations can lead to a significant elevation in the level of LBP.  
34  
35  
36  
37  
38  
39  
40  
41  
42  
43  
44  
45  
46

47 LBP has been considered a key inflammatory marker which mediates LPS-triggered innate immunity <sup>51</sup>.  
48 Although LBP concentration was previously reported to be associated with various anthropometric and  
49 metabolic factors such as BMI, WC, and so on <sup>23-25</sup>, in our study the relationship only existed between the  
50 two biomarkers, FFAs and LBP, but not with the metabolic or anthropometric parameters. It is notable that  
51 the positive relationship between LBP and BMI was not observed in either normal weight or obese groups  
52  
53  
54  
55  
56  
57  
58  
59  
60

1  
2  
3  
4  
5  
6  
7  
8  
9  
10  
11  
12  
13  
14  
15  
16  
17  
18  
19  
20  
21  
22  
23  
24  
25  
26  
27  
28  
29  
30  
31  
32  
33  
34  
35  
36  
37  
38  
39  
40  
41  
42  
43  
44  
45  
46  
47  
48  
49  
50  
51  
52  
53  
54  
55  
56  
57  
58  
59  
60

in Yang *et al.*<sup>52</sup> study after multivariate analyses. In their research, the level of LBP significantly reduced after bariatric surgery and consequent reduction in WC (from 121.6 cm to 90.6 cm;  $P < 0.001$ ) which indicates the strong association of LBP with WC. Liu *et al.*<sup>22</sup> in a population-based follow-up study on 2529 Chinese also found that the association of LBP with MetS was significant only in normal-weight participants, but not in their overweight/obese counterparts after multivariate adjustments including BMI, which supports our study findings. It is assumed that the association between serum LBP level and MetS observed in previous studies<sup>19, 24-25</sup> is mediated by BMI or WC, and finding no association between serum LBP level and incidence of MetS in our study, in which the WC-matched controls were included, is not unexpected.

Overall, what makes our research different from most of previous ones is that in our study we matched the two groups based on WC, rarely observed in prior reports. Most of the previous studies have examined either MetS patients vs. those without the syndrome or metabolically healthy vs. metabolically unhealthy, regardless of their BMI or WC status and based on different metabolic health criteria<sup>3, 8, 28</sup>. A few have examined inflammatory markers between metabolically healthy and unhealthy persons, considering WC or abdominal obesity<sup>36, 38, 39</sup>.

## Conclusion

Our study indicated that WC could be a strong mediator of the association between serum LBP, FFAs, and metabolic alterations. In fact, the levels of LBP and FFAs seem to be more related to abdominal obesity than to the presence or absence of metabolic health. The results also suggested a significant correlation between serum FFAs and LBP in abdominally obese population, which seems to be independent of metabolic aberrations.

## Competing interests

1 None declared.  
2

3 **Authors' contributions**  
4

5  
6 MSA and NK conceived the study design and wrote the study protocol. MSA and NK analyzed and  
7 interpreted the data. MSA, PA, MN, SMG and NK were involved in drafting the manuscript or revising it  
8 critically for content. All authors have given final approval of the version to be published.  
9  
10  
11  
12

13 **Acknowledgments**  
14

15  
16  
17 We would like to thank those who participated in the present study.  
18  
19  
20  
21  
22

23 **Ethical approval**  
24

25  
26  
27 All protocols were approved by regional and organizational ethics committee of TBZMED and MRGUMS,  
28 respectively. Written informed consent was taken from each participant. Research was carried out in  
29 compliance with the Helsinki Declaration.  
30  
31  
32  
33  
34  
35  
36

37 **Consent for publication**  
38

39 Not applicable.  
40  
41  
42  
43

44 **Funding**  
45

46 This work was financially supported by Research Vice-Chancellor, Tabriz University of Medical Sciences and  
47 Maragheh University of Medical Sciences, Iran. The results of this paper were extracted from MSc. thesis of  
48 Nahid Karamzad, registered at Tabriz University of Medical Sciences, Tabriz, Iran.  
49  
50  
51  
52  
53  
54

55 **References**  
56  
57  
58  
59  
60

- 1 Kelly T, Yang W, Chen C-S, Reynolds K and He J. Global burden of obesity in 2005 and projections to 2030. *Int J Obes*. 2008; 32: 1431-7.
- 2 Malik VS, Willett WC and Hu FB. Global obesity: trends, risk factors and policy implications. *Nat Rev Endocrinol*. 2013; 9: 13-27.
- 3 Karelis A and Rabasa-Lhoret R. Inclusion of C-reactive protein in the identification of metabolically healthy but obese (MHO) individuals. *Diabetes Metab*. 2008; 34: 183-4.
- 4 Primeau V, Coderre L, Karelis A, et al. Characterizing the profile of obese patients who are metabolically healthy. *Int J Obes*. 2011; 35: 971-81.
- 5 Hotamisligil GS. Inflammation and metabolic disorders. *Nature*. 2006; 444: 860-7.
- 6 Desai MY, Dalal D, Santos RD, Carvalho JA, Nasir K and Blumenthal RS. Association of body mass index, metabolic syndrome, and leukocyte count. *Am J Cardiol*. 2006; 97: 835-8.
- 7 Guilder GP, Hoetzer GL, Greiner JJ, Stauffer BL and DeSouza CA. Influence of metabolic syndrome on biomarkers of oxidative stress and inflammation in obese adults. *Obesity*. 2006; 14: 2127-31.
- 8 Messier V, Karelis AD, Prud'homme D, Primeau V, Brochu M and Rabasa-Lhoret R. Identifying metabolically healthy but obese individuals in sedentary postmenopausal women. *Obesity*. 2010; 18: 911-7.
- 9 Messier V, Karelis AD, Robillard M-È, et al. Metabolically healthy but obese individuals: relationship with hepatic enzymes. *Metabolism*. 2010; 59: 20-4.
- 10 Karelis AD, Faraj M, Bastard J-P, et al. The metabolically healthy but obese individual presents a favorable inflammation profile. *J Clin Endocrinol Metab*. 2005; 90: 4145-50.
- 11 Wildman RP, Kaplan R, Manson JE, et al. Body size phenotypes and inflammation in the Women's Health Initiative Observational Study. *Obesity*. 2011; 19: 1482-91.
- 12 Ye J. Emerging role of adipose tissue hypoxia in obesity and insulin resistance. *Int J Obes*. 2008; 33: 54-66.
- 13 Karpe F, Dickmann JR and Frayn KN. Fatty acids, obesity, and insulin resistance: time for a reevaluation. *Diabetes*. 2011; 60: 2441-9.
- 14 Boden G. Role of fatty acids in the pathogenesis of insulin resistance and NIDDM. *Diabetes*. 1997; 46: 3-10.
- 15 Laugerette F, Vors C, Peretti N and Michalski M-C. Complex links between dietary lipids, endogenous endotoxins and metabolic inflammation. *Biochimie*. 2011; 93: 39-45.
- 16 Mehta NN, McGillicuddy FC, Anderson PD, et al. Experimental endotoxemia induces adipose inflammation and insulin resistance in humans. *Diabetes*. 2010; 59: 172-81.
- 17 Munford RS. Invited review: Detoxifying endotoxin: time, place and person. *J Endotoxin res*. 2005; 11: 69-84.
- 18 Amar J, Burcelin R, Ruidavets JB, et al. Energy intake is associated with endotoxemia in apparently healthy men. *Am J clin Nutr*. 2008; 87: 1219-23.
- 19 Albillos A, de la Hera A, González M, et al. Increased lipopolysaccharide binding protein in cirrhotic patients with marked immune and hemodynamic derangement. *Hepatology*. 2003; 37: 208-17.
- 20 Ruiz AG, Casafont F, Crespo J, et al. Lipopolysaccharide-binding protein plasma levels and liver TNF-alpha gene expression in obese patients: evidence for the potential role of endotoxin in the pathogenesis of non-alcoholic steatohepatitis. *Obes Surg*. 2007; 17: 1374-80.
- 21 Romani J, Caixàs A, Escoté X, et al. Lipopolysaccharide-binding protein is increased in patients with psoriasis with metabolic syndrome, and correlates with C-reactive protein. *Clin Exp Dermatol*. 2013; 38: 81-4.
- 22 Liu X, Lu L, Yao P, et al. Lipopolysaccharide binding protein, obesity status and incidence of metabolic syndrome: a prospective study among middle-aged and older Chinese. *Diabetologia*. 2014; 57: 1834-41.
- 23 Gonzalez-Quintela A, Alonso M, Campos J, Vizcaino L, Loidi L and Gude F. Determinants of serum concentrations of lipopolysaccharide-binding protein (LBP) in the adult population: the role of obesity. *PLoS One*. 2013; 8: e54600.
- 24 Moreno-Navarrete J, Ortega F, Serino M, et al. Circulating lipopolysaccharide-binding protein (LBP) as a marker of obesity-related insulin resistance. *Int J Obes*. 2012; 36: 1442-9.
- 25 Sun L, Yu Z, Ye X, et al. A marker of endotoxemia is associated with obesity and related metabolic disorders in apparently healthy Chinese. *Diabetes care*. 2010; 33: 1925-32.
- 26 Kuk JL, Lee S, Heymsfield SB and Ross R. Waist circumference and abdominal adipose tissue distribution: influence of age and sex. *Am J clin Nutr*. 2005; 81: 1330-4.
- 27 Azizi F, Khalili D, Aghajani H, et al. Appropriate waist circumference cut-off points among Iranian adults: the first report of the Iranian National Committee of Obesity. *Arch Iranian Med*. 2010; 13: 243.

28. Meigs JB, Wilson PW, Fox CS, et al. Body mass index, metabolic syndrome, and risk of type 2 diabetes or cardiovascular disease. *J Clin Endocrinol Metab.* 2006; 91: 2906-12.
29. Moradi S, Keshavarzi A and Tabatabaee S-M. Is Stress Hyperglycemia a Predicting Factor of Developing Diabetes in Future? *Exp Clin Endocrinol Diabetes.* 2015; 123: 614-6.
30. Mirmiran P, Esmailzadeh A and Azizi F. Detection of cardiovascular risk factors by anthropometric measures in Tehranian adults: receiver operating characteristic (ROC) curve analysis. *Eur J Clin Nutr.* 2004; 58: 1110-8.
31. Taylor RW, Jones IE, Williams SM and Goulding A. Evaluation of waist circumference, waist-to-hip ratio, and the conicity index as screening tools for high trunk fat mass, as measured by dual-energy X-ray absorptiometry, in children aged 3–19 y. *American J Clin Nutr.* 2000; 72: 490-5.
32. Azizi F, Ghanbarian A, Madjid M and Rahmani M. Distribution of blood pressure and prevalence of hypertension in Tehran adult population: Tehran Lipid and Glucose Study (TLGS), 1999-2000. *J Hum Hypertens.* 2002; 16: 305-12.
33. Vasheghani-Farahani A, Tahmasbi M, Asheri H, Ashraf H, Nedjat S and Kordi R. The Persian, last 7-day, long form of the International Physical Activity Questionnaire: translation and validation study. *Asian J Sports Med.* 2011; 2: 106.
34. Zhang J, Zhao Y, Xu C, et al. Association between serum free fatty acid levels and nonalcoholic fatty liver disease: a cross-sectional study. *Sci Rep.* 2014; 4: 5832.
35. Halkes C, Van Dijk H, De Jaegere PT, et al. Postprandial increase of complement component 3 in normolipidemic patients with coronary artery disease effects of expanded-dose simvastatin. *Arterioscler Thromb Vasc Biol.* 2001; 21: 1526-30.
36. Engström G, Hedblad B, Eriksson K-F, Janzon L and Lindgärde F. Complement C3 Is a Risk Factor for the Development of Diabetes A Population-Based Cohort Study. *Diabetes.* 2005; 54: 570-5.
37. Detection EPO. EVALUATION, AND TREATMENT OF HIGH BLOOD CHOLESTEROL IN ADULTS. Executive summary of the third report of The National Cholesterol Education Program (NCEP) Expert panel on detection, evaluation, and treatment of high blood cholesterol in adults (Adult Treatment Panel III). *JAMA.* 2001; 285: 2486-97.
38. Phillips CM, Kesse-Guyot E, Ahluwalia N, et al. Dietary fat, abdominal obesity and smoking modulate the relationship between plasma complement component 3 concentrations and metabolic syndrome risk. *Atherosclerosis.* 2012; 220: 513-9.
39. Marques-Vidal P, Velho S, Waterworth D, Waeber G, von Känel R and Vollenweider P. The association between inflammatory biomarkers and metabolically healthy obesity depends of the definition used. *Eur J Clin Nutr.* 2012; 66: 426-35.
40. Phillips CM, Dillon C, Harrington JM, et al. Defining metabolically healthy obesity: role of dietary and lifestyle factors. *PLoS One.* 2013; 8: e76188.
41. Beasley LE, Koster A, Newman AB, et al. Inflammation and race and gender differences in computerized tomography-measured adipose depots. *Obesity.* 2009; 17: 1062-9.
42. Muscari A, Massarelli G, Bastagli L, et al. Relationship of serum C3 to fasting insulin, risk factors and previous ischaemic events in middle-aged men. *Eur Heart J.* 2000; 21: 1081-90.
43. Moro E, Gallina P, Pais M, Cazzolato G, Alessandrini P and Bittolo-Bon G. Hypertriglyceridemia is associated with increased insulin resistance in subjects with normal glucose tolerance: evaluation in a large cohort of subjects assessed with the 1999 World Health Organization criteria for the classification of diabetes. *Metabolism.* 2003; 52: 616-9.
44. Schmidt MI and Duncan BB. Diabetes: an inflammatory metabolic condition. *Clin Chem Lab Med.* 2003; 41: 1120-30.
45. You T and Nicklas BJ. Effects of exercise on adipokines and the metabolic syndrome. *Curr Diabetes Rep.* 2008; 8: 7-11.
46. Fantuzzi G. Adipose tissue, adipokines, and inflammation. *J Allergy Clin Immunol.* 2005; 115: 911-9.
47. Björntorp P, Bergman H and Varmauskas E. Plasma free fatty acid turnover rate in obesity. *Acta Med Scand.* 1969; 185: 351-6.
48. Jensen MD, Haymond MW, Rizza RA, Cryer PE and Miles J. Influence of body fat distribution on free fatty acid metabolism in obesity. *J Clin Invest.* 1989; 83: 1168.
49. Boden G, Cheung P, Stein TP, Kresge K and Mozzoli M. FFA cause hepatic insulin resistance by inhibiting insulin suppression of glycogenolysis. *Am J Physiol-Endocrinol Metab.* 2002; 283: E12-E9.

- 1  
2  
3  
4  
5  
6  
7  
8  
9  
10  
11  
12  
13  
14  
15  
16  
17  
18  
19  
20  
21  
22  
23  
24  
25  
26  
27  
28  
29  
30  
31  
32  
33  
34  
35  
36  
37  
38  
39  
40  
41  
42  
43  
44  
45  
46  
47  
48  
49  
50  
51  
52  
53  
54  
55  
56  
57  
58  
59  
60
50. Santomauro A, Boden G, Silva M, et al. Overnight lowering of free fatty acids with Acipimox improves insulin resistance and glucose tolerance in obese diabetic and nondiabetic subjects. *Diabetes*. 1999; 48: 1836-41.
51. Schumann RR. Old and new findings on lipopolysaccharide-binding protein: a soluble pattern-recognition molecule. *Biochem Soc Trans*. 2011; 39: 989-93.
52. Yang P-J, Lee W-J, Tseng P-H, Lee P-H, Lin M-T and Yang W-S. Bariatric surgery decreased the serum level of an endotoxin-associated marker: lipopolysaccharide-binding protein. *Surg Obes Relat Dis*. 2014; 10: 1182-7.

For peer review only



**Table 1. Demographic, anthropometric, and dietary intake parameters in MUAO and MHAO patients**

| Variables                            | MUAO (n=81)       | MHAO (n=83)       | OR (95% CI)        | <i>p</i>           |
|--------------------------------------|-------------------|-------------------|--------------------|--------------------|
| Age (y)†                             | 38.23 (8.52)      | 37.13 (8.64)      | 1.01 (0.97-1.05)   | 0.412 <sup>ξ</sup> |
| Men (%)                              | 50.6              | 49.4              | 1.05 (0.57-1.93)   | 0.876 <sup>£</sup> |
| Physical activity score <sup>¥</sup> | 3144 (1416, 5166) | 2412 (1260, 5211) | 1.00 (0.99, 1.00)  | 0.451 <sup>Ⓜ</sup> |
| Weight (Kg)†                         | 87.21 (13.90)     | 84.78 (13.98)     | 1.01 (0.99, 1.03)  | 0.266 <sup>ξ</sup> |
| Height (cm)†                         | 165.09 (11.56)    | 164.56 (10.60)    | 1.00 (0.97, 1.03)  | 0.762 <sup>ξ</sup> |
| Waist circumference (cm) †           | 106.02 (8.30)     | 105.06 (8.63)     | 1.01 (0.97, 1.05)  | 0.470 <sup>ξ</sup> |
| Hip circumference (cm)†              | 110.90 (6.92)     | 111.31 (8.26)     | 0.99 (0.95, 1.03)  | 0.730 <sup>ξ</sup> |
| Waist to hip ratio†                  | 0.95 (0.05)       | 0.94 (0.06)       | 2.73 (0.15, 48.00) | 0.209 <sup>ξ</sup> |
| BMI (Kg/m <sup>2</sup> )†            | 32.16 (4.25)      | 31.35 (4.12)      | 1.04 (0.97, 1.12)  | 0.214 <sup>ξ</sup> |
| Body Fat Percentage (%)†             |                   |                   |                    |                    |
| Males                                | 26.86 (5.15)      | 25.07 (4.86)      | 1.07 (0.98, 1.17)  | 0.093 <sup>ξ</sup> |
| Females                              | 38.59 (4.38)      | 39.88 (4.79)      | 0.93 (0.85, 1.03)  | 0.227 <sup>ξ</sup> |
| Body Fat Mass (kg)†                  |                   |                   |                    |                    |
| Males                                | 25.91 (7.27)      | 22.79 (6.76)      | 1.06 (1.00, 1.13)  | 0.062 <sup>ξ</sup> |
| Females                              | 31.11 (7.33)      | 32.4 (8.63)       | 0.98 (0.92, 1.03)  | 0.441 <sup>ξ</sup> |
| Body Fat Free Mass (kg)†             |                   |                   |                    |                    |
| Males                                | 69.09 (6.69)      | 66.98 (7.85)      | 1.04 (0.98, 1.10)  | 0.130 <sup>ξ</sup> |
| Females                              | 48.72 (5.08)      | 47.61 (4.94)      | 1.04 (0.95, 1.14)  | 0.425 <sup>ξ</sup> |
| Total energy intake (Kcal/day)†      | 2152.9 (765.1)    | 2206.8 (862.9)    | 1.00 (0.97-1.04)   | 0.700 <sup>ξ</sup> |
| Carbohydrate intake (% energy)†      | 60.20 (10.09)     | 59.29 (9.11)      | 1.01 (0.97-1.04)   | 0.499 <sup>ξ</sup> |
| Protein intake (% energy)†           | 14.22 (2.95)      | 14.17 (4.10)      | 1.00 (0.91-1.09)   | 0.937 <sup>ξ</sup> |
| Total fat intake (% energy)†         | 25.58 (10.54)     | 26.54 (12.14)     | 0.98 (0.95-1.02)   | 0.380 <sup>ξ</sup> |

|                                           |                      |                      |                  |                    |
|-------------------------------------------|----------------------|----------------------|------------------|--------------------|
| Total SFA intake (% energy) <sup>‡</sup>  | 14.06 (10.6, 21.87)  | 14.21 (10.18, 21.49) | 0.99 (0.96-1.02) | 0.780 <sup>Ⓜ</sup> |
| Total MUFA intake (% energy) <sup>‡</sup> | 16.39 (11.01, 24.68) | 18.26 (11.76-26.27)  | 0.99 (0.97-1.01) | 0.183 <sup>Ⓜ</sup> |
| Total PUFA intake (% energy) <sup>‡</sup> | 12.7 (9.59-22.19)    | 14.41 (8.94, 19.01)  | 1.01 (0.98-1.03) | 0.943 <sup>Ⓜ</sup> |

<sup>†</sup>Variables with normal numeric scales are reported as Mean (standard deviation).

<sup>‡</sup>Variables with non-normal numeric scales are reported as Median (25<sup>th</sup>, 75<sup>th</sup>).

<sup>§</sup>Independent Samples t-test

<sup>Ⓜ</sup>Mann-Whitney U test

<sup>£</sup>Chi Square test

MHAO, Metabolically Healthy Abdominally Obese; MUAO, Metabolically Unhealthy Abdominally Obese; OR, Odds Ratio; CI, Confidence Interval; BMI, Body Mass Index; SFA, Saturated Fatty Acids; MUFA, Mono Unsaturated fatty Acids; PUFA, Poly Unsaturated Fatty Acids.

**Table 2. Biochemical characteristics in MUAO and MHAO patients**

| Variables             | MUAO (n=81)    | MHAO (n=83)    | OR (95% CI)       | <i>p</i>            |
|-----------------------|----------------|----------------|-------------------|---------------------|
| FBS (mg/dL) ¥         | 87.72 (5.82)   | 95.50 (9.76)   | 3.79 (2.25-6.40)* | <0.001 <sup>ξ</sup> |
| TG (mg/dL) ¥          | 193 (151, 241) | 112 (88, 146)  | 1.10 (1.05-1.15)* | <0.001 <sup>Ⓜ</sup> |
| HDL-C (mg/dL) †       | 39.53 (6.65)   | 46.44 (9.20)   | 0.32 (0.20-0.52)* | <0.001 <sup>ξ</sup> |
| SBP (mg/dL) ¥         | 115 (16.45)    | 108.13 (16.60) | 1.02 (1.00-1.04)* | 0.009 <sup>ξ</sup>  |
| DBP (mg/dL) ¥         | 77.31 (13.86)  | 70.84 (12.94)  | 1.03 (1.01-1.06)* | 0.002 <sup>ξ</sup>  |
| Cholesterol (mg/dL) † | 193.60 (41.37) | 187.37 (32.91) | 1.00 (0.99, 1.01) | 0.286 <sup>ξ</sup>  |

† Variables with normal numeric scales are reported as Mean (standard deviation).

¥ Variables with non-normal numeric scales are reported as Median (25<sup>th</sup>, 75<sup>th</sup>).

<sup>ξ</sup> Independent Samples t- test

<sup>Ⓜ</sup> Mann- Whitney U test

MHAO, Metabolically Healthy Abdominally Obese; MUAO, Metabolically Unhealthy Abdominally Obese; OR, Odds Ratio; CI, Confidence Interval; FBS, Fasting Blood Sugar; TG, Triglycerides; HDL-C, High-Density Lipoprotein Cholesterol; SBP, Systolic Blood Pressure; DBP, Diastolic Blood Pressure

**Table 3.** correlation of FFAs and LBP with metabolic parameters in MUAO and MHAO individuals

| Variables | MUAO          |              | MHAO         |              |
|-----------|---------------|--------------|--------------|--------------|
|           | FFAs          | LBP          | FFAs         | LBP          |
| WC        | 0.07 (0.51)   | 0.02 (0.85)  | 0.06 (0.58)  | 0.03 (0.74)  |
| TG        | -0.02 (0.79)  | 0.008 (0.94) | -0.07 (0.48) | 0.07 (0.49)  |
| FBS       | -0.005 (0.96) | -0.18 (0.09) | 0.07 (0.50)  | 0.09 (0.40)  |
| HDL-C     | 0.01 (0.91)   | 0.08 (0.45)  | 0.10 (0.33)  | 0.41 (0.09)  |
| SBP       | -0.03 (0.78)  | -0.08 (0.46) | -0.05 (0.64) | -0.11 (0.29) |
| DBP       | -0.08 (0.43)  | -0.18 (1.00) | 0.06 (0.58)  | -0.09 (0.39) |

P=NS, using Spearman correlation coefficient test.

MHAO, Metabolically Healthy Abdominally Obese; MUAO, Metabolically Unhealthy Abdominally Obese; FBS, Fasting Blood Sugar; TG, Triglycerides; HDL-C, High-Density Lipoprotein Cholesterol; SBP, Systolic Blood Pressure; DBP, Diastolic Blood Pressure; LBP, Lipopolysaccharide Binding Protein; FFAs, Free Fatty Acids

Figure 1. Flowchart of the study

1  
2  
3  
4  
5  
6  
7  
8  
9  
10  
11  
12  
13  
14  
15  
16  
17  
18  
19  
20  
21  
22  
23  
24  
25  
26  
27  
28  
29  
30  
31  
32  
33  
34  
35  
36  
37  
38  
39  
40  
41  
42  
43  
44  
45  
46  
47  
48  
49  
50  
51  
52  
53  
54  
55  
56  
57  
58  
59  
60

For peer review only

Figure 2. Metabolic characteristics of MHAO and MUAO subjects.

p<0.001 for all except WC, using  $\chi^2$ .

MHAO, Metabolically Healthy Abdominally Obese; MUAO, Metabolically Unhealthy Abdominally Obese; FBS, Fasting Blood Sugar; TG, Triglycerides; HDL-C, High-Density Lipoprotein Cholesterol; Htn, Hypertension.

For peer review only

Figure 3. Lipopolysaccharide binding protein (LBP) ( $\mu\text{g}/\text{mL}$ ) (a) and free fatty acids (FFAs) concentrations (nmol/L) (b) in subjects with MHAO (Controls) and MUAO (Cases).

$p=\text{NS}$

Data are presented as box plot where boxes represent the interquartile range [IQR], the line within boxes represent the median, and the lines outside the boxes represent the lower quartile minus 1.5 times the IQR or the upper quartile plus 1.5 times the IQR.

For peer review only

1 Figure 4. Spearman correlation between LBP and FFAs in pooled population (Fig. 4-a) as well as in each  
2 study group (Fig. 4-b).  
3  
4  
5  
6  
7  
8  
9  
10  
11  
12  
13  
14  
15  
16  
17  
18  
19  
20  
21  
22  
23  
24  
25  
26  
27  
28  
29  
30  
31  
32  
33  
34  
35  
36  
37  
38  
39  
40  
41  
42  
43  
44  
45  
46  
47  
48  
49  
50  
51  
52  
53  
54  
55  
56  
57  
58  
59  
60

For peer review only





Figure 1. Flowchart of the study

76x67mm (300 x 300 DPI)

only



Figure 2. Metabolic characteristics of MHAO and MUAO subjects. † † P<0.001 for all except WC, using X2. † † † MHAO, Metabolically Healthy Abdominally Obese; MUAO, Metabolically Unhealthy Abdominally Obese; FBS, Fasting Blood Sugar; TG, Triglycerides; HDL-C, High-Density Lipoprotein Cholesterol; Htn, Hypertension. † † †

51x27mm (300 x 300 DPI)



Figure 3. Lipopolysaccharide binding protein (LBP) ( $\mu\text{g/mL}$ ) (a) and free fatty acids (FFAs) concentrations ( $\text{nmol/L}$ ) (b) in subjects with MHAO (Controls) and MUAO (Cases).  $\dagger \dagger P=\text{NS} \dagger \dagger$  Data are presented as box plot where boxes represent the interquartile range [IQR], the line within boxes represent the median, and the lines outside the boxes represent the lower quartile minus 1.5 times the IQR or the upper quartile plus 1.5 times the IQR.  $\dagger \dagger \dagger \dagger$

52x22mm (300 x 300 DPI)

review only

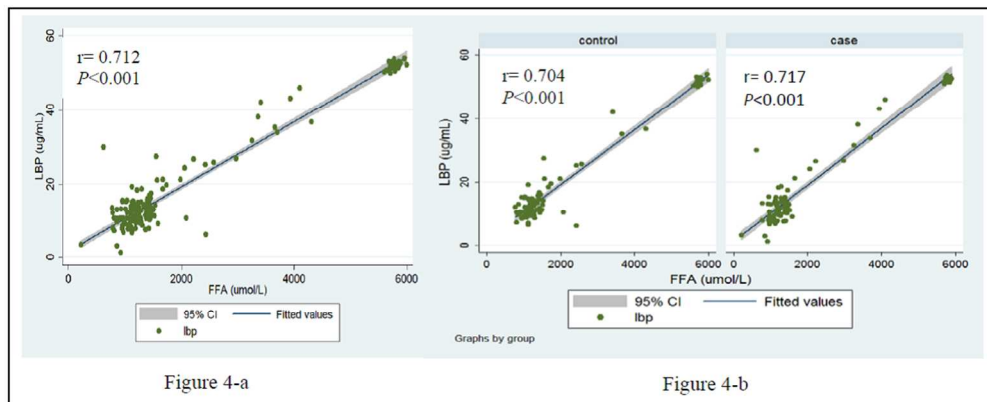

Figure 4. Spearman correlation between LBP and FFAs in pooled population (Fig. 4-a) as well as in each study group (Fig. 4-b).

96x39mm (300 x 300 DPI)

Peer review only

1  
2  
3  
4  
5  
6  
7  
8  
9  
10  
11  
12  
13  
14  
15  
16  
17  
18  
19  
20  
21  
22  
23  
24  
25  
26  
27  
28  
29  
30  
31  
32  
33  
34  
35  
36  
37  
38  
39  
40  
41  
42  
43  
44  
45  
46  
47  
48  
49  
50  
51  
52  
53  
54  
55  
56  
57  
58  
59  
60

STROBE 2007 (v4) Statement—Checklist of items that should be included in reports of *case-control studies*

| Section/Topic             | Item # | Recommendation                                                                                                                                                                       | Reported on page # |
|---------------------------|--------|--------------------------------------------------------------------------------------------------------------------------------------------------------------------------------------|--------------------|
| Title and abstract        | 1      | (a) Indicate the study’s design with a commonly used term in the title or the abstract                                                                                               | 2                  |
|                           |        | (b) Provide in the abstract an informative and balanced summary of what was done and what was found                                                                                  | 2, 3               |
| <b>Introduction</b>       |        |                                                                                                                                                                                      |                    |
| Background/rationale      | 2      | Explain the scientific background and rationale for the investigation being reported                                                                                                 | 4, 5               |
| Objectives                | 3      | State specific objectives, including any prespecified hypotheses                                                                                                                     | 5                  |
| <b>Methods</b>            |        |                                                                                                                                                                                      |                    |
| Study design              | 4      | Present key elements of study design early in the paper                                                                                                                              | 5                  |
| Setting                   | 5      | Describe the setting, locations, and relevant dates, including periods of recruitment, exposure, follow-up, and data collection                                                      | 5                  |
| Participants              | 6      | (a) Give the eligibility criteria, and the sources and methods of case ascertainment and control selection. Give the rationale for the choice of cases and controls                  | 5, 6               |
|                           |        | (b) For matched studies, give matching criteria and the number of controls per case                                                                                                  | 5                  |
| Variables                 | 7      | Clearly define all outcomes, exposures, predictors, potential confounders, and effect modifiers. Give diagnostic criteria, if applicable                                             | 6                  |
| Data sources/ measurement | 8*     | For each variable of interest, give sources of data and details of methods of assessment (measurement). Describe comparability of assessment methods if there is more than one group | 6,7                |
| Bias                      | 9      | Describe any efforts to address potential sources of bias                                                                                                                            | 3                  |
| Study size                | 10     | Explain how the study size was arrived at                                                                                                                                            | 8                  |
| Quantitative variables    | 11     | Explain how quantitative variables were handled in the analyses. If applicable, describe which groupings were chosen and why                                                         | 8                  |
| Statistical methods       | 12     | (a) Describe all statistical methods, including those used to control for confounding                                                                                                | 8                  |
|                           |        | (b) Describe any methods used to examine subgroups and interactions                                                                                                                  | Not applicable     |
|                           |        | (c) Explain how missing data were addressed                                                                                                                                          | Not applicable     |
|                           |        | (d) If applicable, explain how matching of cases and controls was addressed                                                                                                          | 5                  |
|                           |        | (e) Describe any sensitivity analyses                                                                                                                                                | Not applicable     |
| <b>Results</b>            |        |                                                                                                                                                                                      |                    |

1  
2  
3  
4  
5  
6  
7  
8  
9  
10  
11  
12  
13  
14  
15  
16  
17  
18  
19  
20  
21  
22  
23  
24  
25  
26  
27  
28  
29  
30  
31  
32  
33  
34  
35  
36  
37  
38  
39  
40  
41  
42  
43  
44  
45  
46  
47  
48  
49

|                          |     |                                                                                                                                                                                                              |                |
|--------------------------|-----|--------------------------------------------------------------------------------------------------------------------------------------------------------------------------------------------------------------|----------------|
| Participants             | 13* | (a) Report numbers of individuals at each stage of study—eg numbers potentially eligible, examined for eligibility, confirmed eligible, included in the study, completing follow-up, and analysed            | 6              |
|                          |     | (b) Give reasons for non-participation at each stage                                                                                                                                                         | 6              |
|                          |     | (c) Consider use of a flow diagram                                                                                                                                                                           | Figure 1       |
| Descriptive data         | 14* | (a) Give characteristics of study participants (eg demographic, clinical, social) and information on exposures and potential confounders                                                                     | Table 1        |
|                          |     | (b) Indicate number of participants with missing data for each variable of interest                                                                                                                          | Table 1        |
| Outcome data             | 15* | Report numbers in each exposure category, or summary measures of exposure                                                                                                                                    | Table 1,2      |
| Main results             | 16  | (a) Give unadjusted estimates and, if applicable, confounder-adjusted estimates and their precision (eg, 95% confidence interval). Make clear which confounders were adjusted for and why they were included | Table 1, 2     |
|                          |     | (b) Report category boundaries when continuous variables were categorized                                                                                                                                    | 6              |
|                          |     | (c) If relevant, consider translating estimates of relative risk into absolute risk for a meaningful time period                                                                                             | Not applicable |
| Other analyses           | 17  | Report other analyses done—eg analyses of subgroups and interactions, and sensitivity analyses                                                                                                               | Not applicable |
| <b>Discussion</b>        |     |                                                                                                                                                                                                              |                |
| Key results              | 18  | Summarise key results with reference to study objectives                                                                                                                                                     | 9              |
| Limitations              | 19  | Discuss limitations of the study, taking into account sources of potential bias or imprecision. Discuss both direction and magnitude of any potential bias                                                   | 3              |
| Interpretation           | 20  | Give a cautious overall interpretation of results considering objectives, limitations, multiplicity of analyses, results from similar studies, and other relevant evidence                                   | 10-12          |
| Generalisability         | 21  | Discuss the generalisability (external validity) of the study results                                                                                                                                        | 3, 12          |
| <b>Other information</b> |     |                                                                                                                                                                                                              |                |
| Funding                  | 22  | Give the source of funding and the role of the funders for the present study and, if applicable, for the original study on which the present article is based                                                | 13             |

\*Give information separately for cases and controls in case-control studies and, if applicable, for exposed and unexposed groups in cohort and cross-sectional studies.

**Note:** An Explanation and Elaboration article discusses each checklist item and gives methodological background and published examples of transparent reporting. The STROBE checklist is best used in conjunction with this article (freely available on the Web sites of PLoS Medicine at <http://www.plosmedicine.org/>, Annals of Internal Medicine at <http://www.annals.org/>, and Epidemiology at <http://www.epidem.com/>). Information on the STROBE Initiative is available at [www.strobe-statement.org](http://www.strobe-statement.org).
